# Supplementary material for: Somatic mutations in clonally expanded cytotoxic T lymphocytes in patients with newly diagnosed rheumatoid arthritis
Source: PubMed Central journal article supplement (PMC5482061; doi:10.1038/ncomms15869), 2017-06-21
Supplement: ncomms15869-s1.pdf [file ncomms15869-s1.pdf]

Type of file: pdf

Title of file for HTML: Supplementary Information

Description: Supplementary Figures, Supplementary Tables and Supplementary References

Type of file: xlsx

Title of file for HTML: Supplementary Data 1

Description: The file presents all putative coding single nucleotide variants that were identified in the immunopanel sequencing and in the exome sequencing of RA patients' and healthy controls' lymphocyte fractions.

Type of file: PDF

Title of file for HTML: Peer Review File

Description:

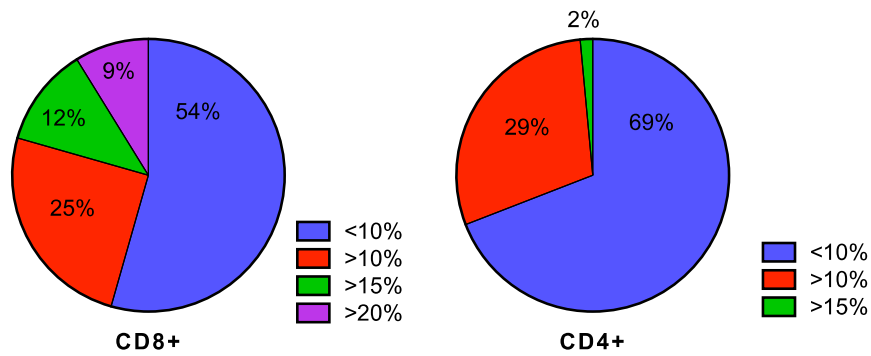

**Supplementary Figure 1. Flow cytometry based screening of clonality of CD4+ and CD8+ cells.** A panel of monoclonal antibodies designed to cover 70% of the total T-cell pool was used to simultaneously assess the V $\beta$  distribution of both CD4+ and CD8+ T cells in 68 patients. The results show that CD8+ T cells have more populations expressing the same V $\beta$ . Populations comprising over 10% of all CD8+ T cells occurred in 46% of patients, whereas similar populations occurred in CD4+ in 31% of patients. This suggests that CD8+ T cells harbor more clonally expanded cell populations than CD4+ T cells.

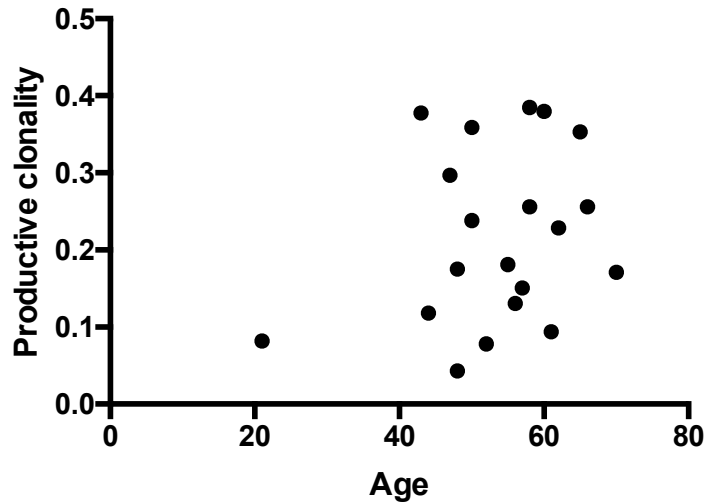

**Supplementary Figure 2. CD8+ clonality of 20 healthy controls does not correlate with age.** The productive clonality index of CD8+ cells was correlated with the age of the 20 healthy controls included in our study. There was no statistically significant correlation (Spearman correlation coefficient  $r=0.2183$ ,  $p=0.3552$ ). However, a correlation was seen in RA patients (Figure 1d). This may be due to the narrower age range and lower sample amount of the healthy controls.

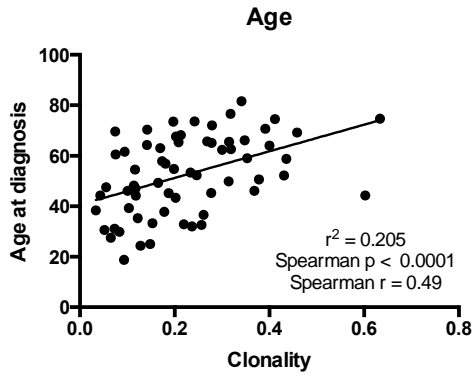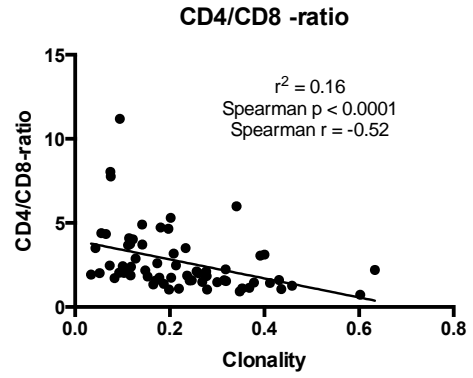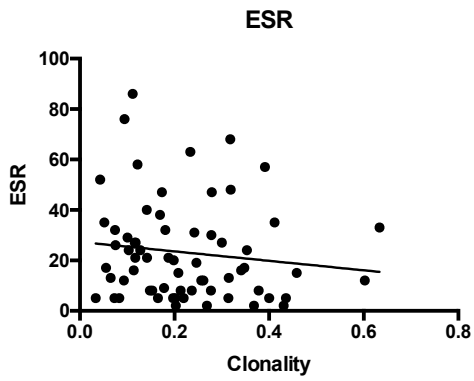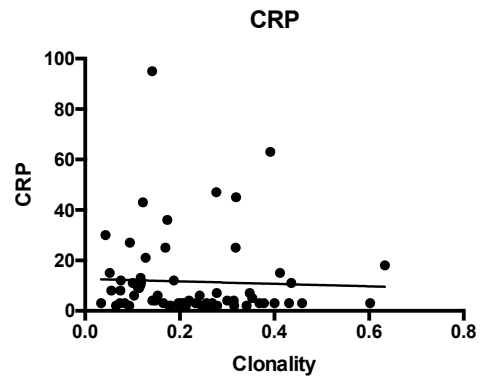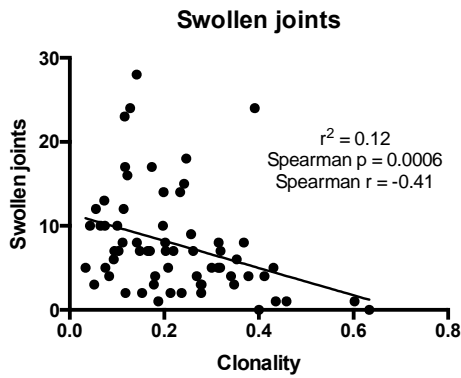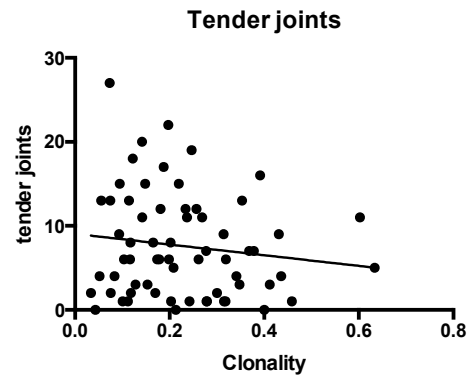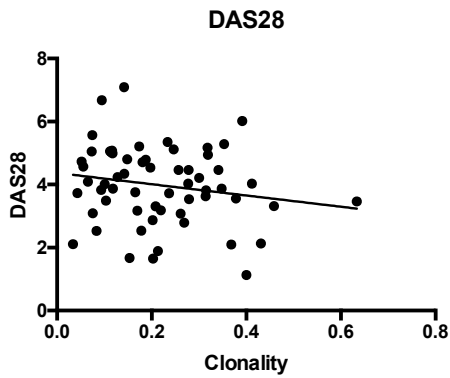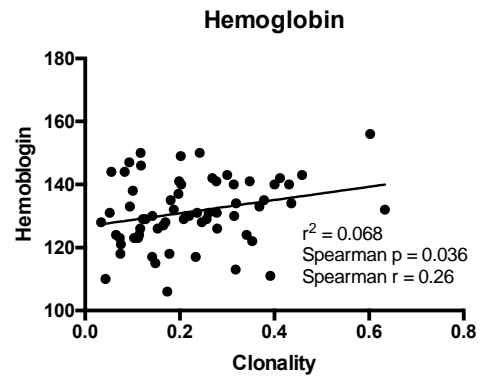

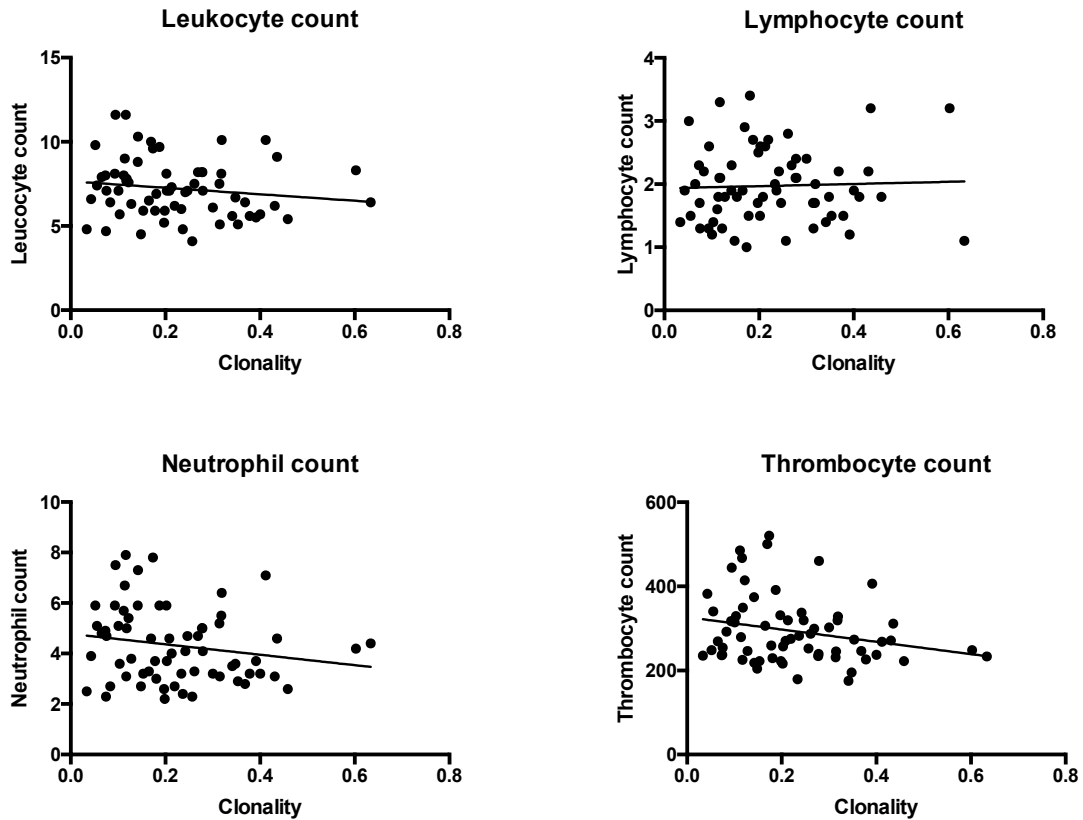

**Supplementary Figure 3. Clonality and clinical parameters.** Clonality was plotted with clinical variables, and correlations were tested with Spearman correlation. Statistically significant associations are shown in the plots (Linear regression  $r^2$ , Spearman correlation coefficient  $r$  and  $p$ -values). All blood-cell counts are shown as  $10^9/l$ , and in all cases the clonality has been calculated based only on productive clones.

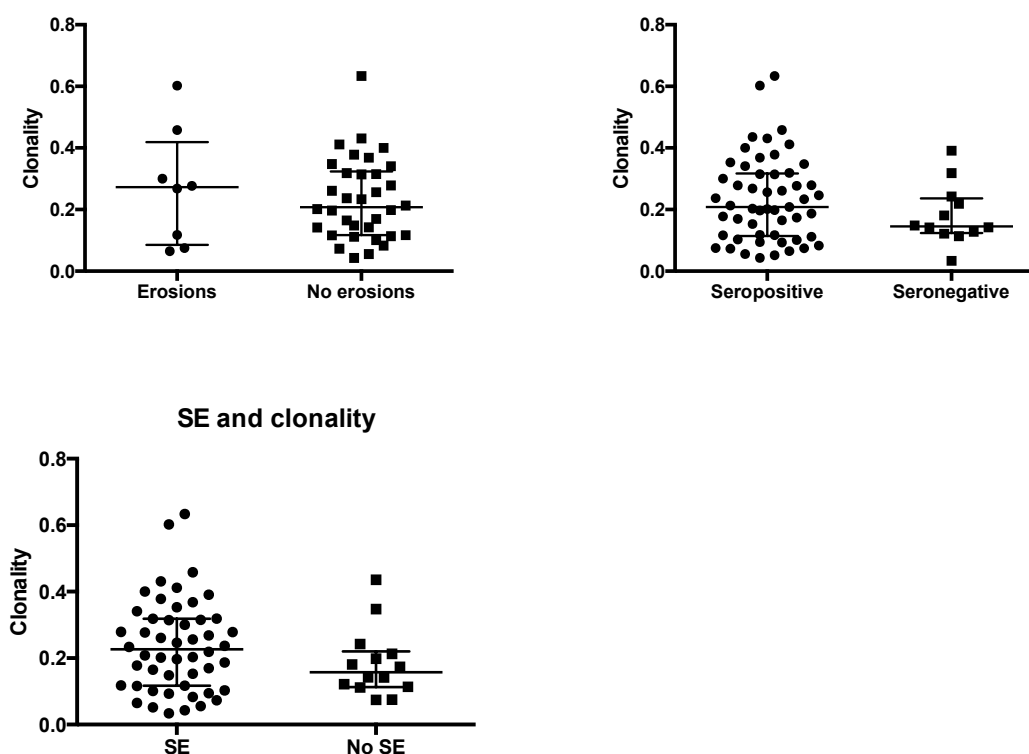

**Supplementary Figure 4. Associations of seropositivity, radiographic erosions, and shared epitope alleles with clonality.** The CD8 clonality index scores of patients with radiographic erosions in hands or feet at diagnosis were compared to the scores of patients without radiographic erosions. Similarly, the clonality of seropositive and seronegative patients, as well as the clonality of patients with shared epitope (SE)<sup>1</sup> and no shared epitope, was compared. No statistically significant difference emerged between groups (Mann Whitney test). Seropositivity was defined by rheumatoid factor or anti-citrullinated antibody titers larger than >30 IU/ml and U/ml, respectively. These values are considered strongly positive. In all cases, the clonality has been calculated based only on productive clones. Horizontal lines represent group medians and error bars the interquartile range.

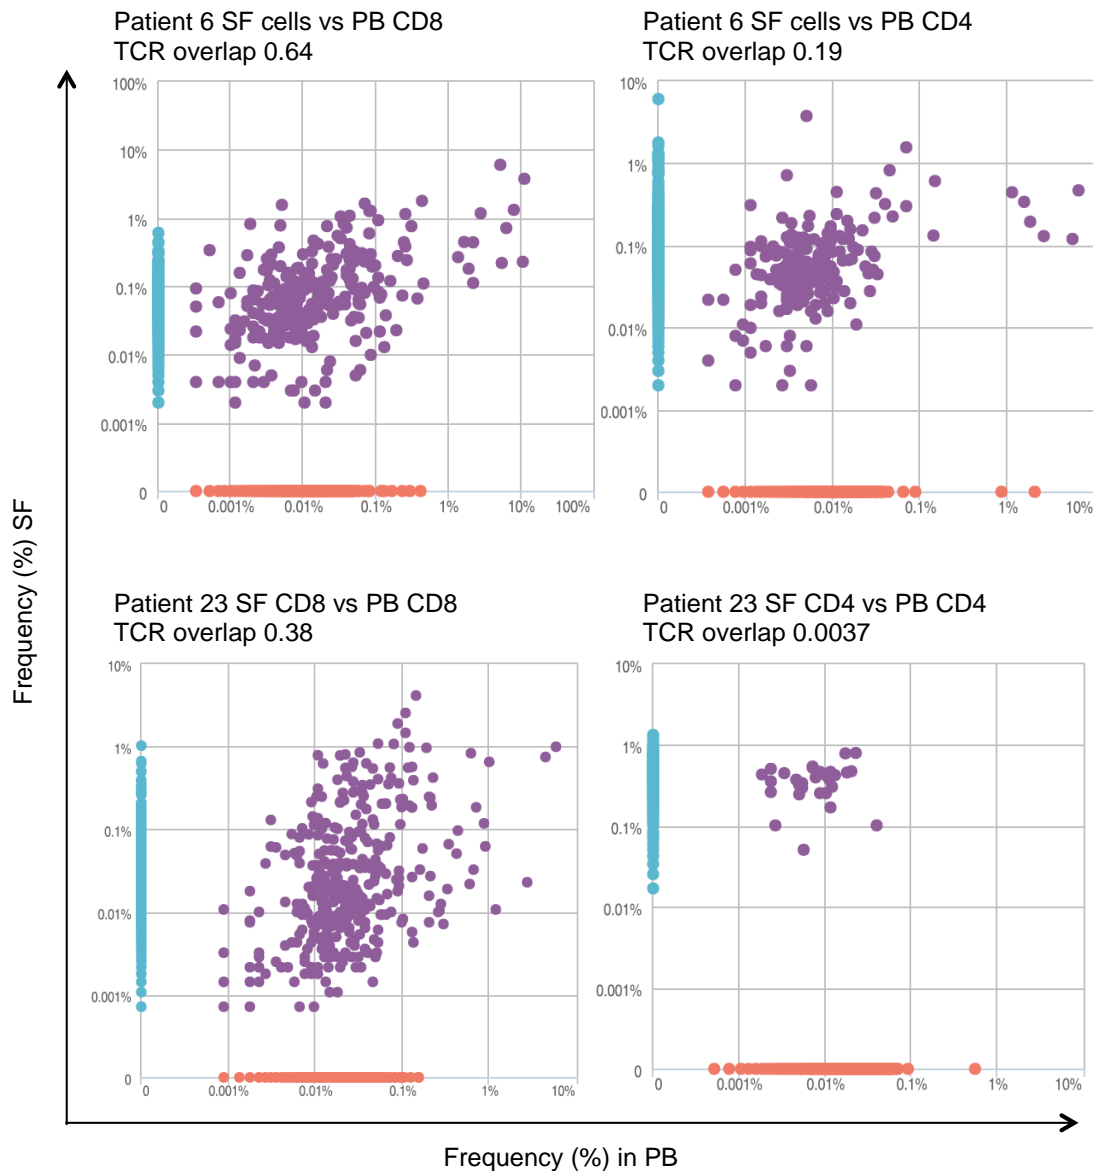

**Supplementary Figure 5. The analysis of identical CD8+ clones in peripheral blood and synovial fluid.** Same TCRB amino-acid sequences were detected by deep TCRB sequencing in synovial fluid (SF) and peripheral blood (PB) cells. We had access to only two synovial fluid samples from two patients. In the plots, violet dots represent clones (defined by same nucleotide sequence in TCRB sequencing) that were detected in both SF and PB. From patient 6, selected cells from SF were not available, and the sequencing was performed from unselected SF cell DNA. Thus, the percentages are not directly comparable. Patient 6 harbored a clone at 11.1% of all CD8 in peripheral blood (PB), and the same clone comprised 3.8% of all productive synovial fluid (SF) TCRB rearrangements. Another clone occurred in PB at 5.3% and in SF at 6.0%. In patient 23, the largest clone in blood occurred at 5.8% of CD8+ and was 1.0% of SF CD8+ cells. In this patient, sorted cells were available from both peripheral blood and synovial fluid.

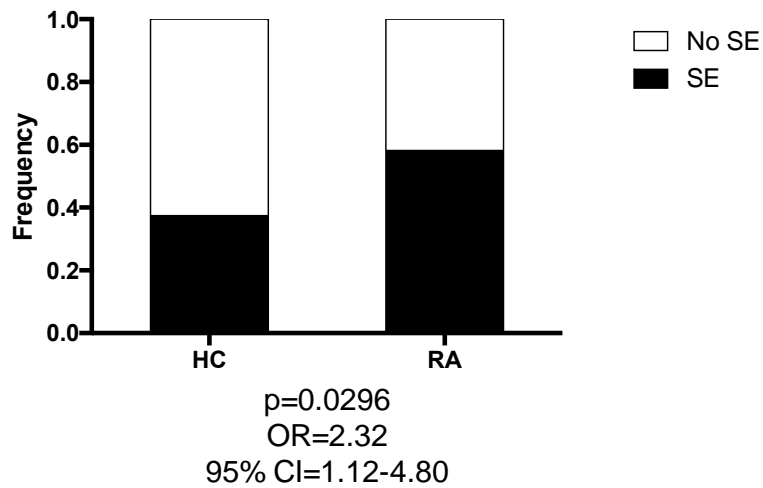

**Supplementary Figure 6. Shared epitope frequencies in RA patients and healthy controls.** We determined HLA-DRB1 allele frequencies in the study patients to characterize the patient cohort. In RA patients, the frequency of shared epitope alleles (HLA-DRB1\*01, HLA-DRB1\*04, HLA-DRB1\*10, HLA-DRB1\*14:02 alleles)<sup>1</sup> of all alleles was 58%, whereas in healthy controls the frequency was 37,5%. The difference between the groups was tested with Fisher's test. Abbreviations: HC, healthy control; RA, rheumatoid arthritis; SE, shared epitope; OR, odds ratio; CI, confidence interval.



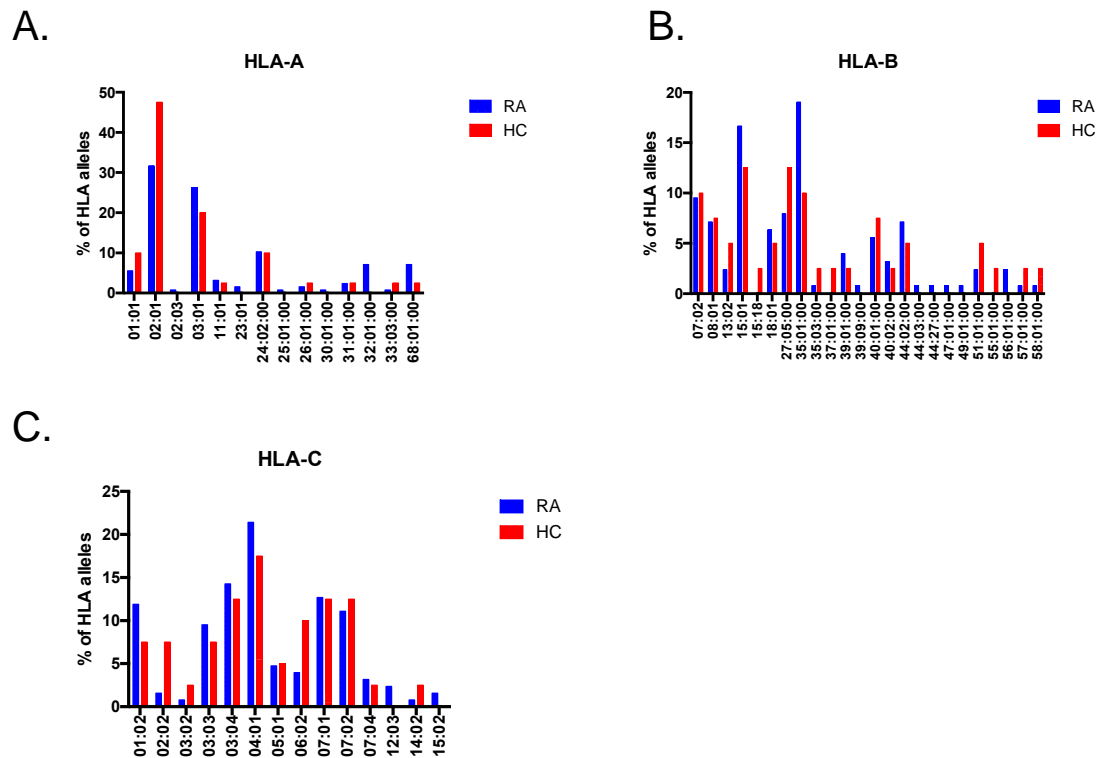

**Supplementary Figure 7. HLA-I allele frequencies in patients and healthy controls.** The HLA-I alleles of 65 patients and 20 healthy controls were determined, and the frequency of each allele is shown in each plot. There were no statistically significant differences between the patients and healthy controls in any allele frequency (Fisher's test).

# A: PADI4

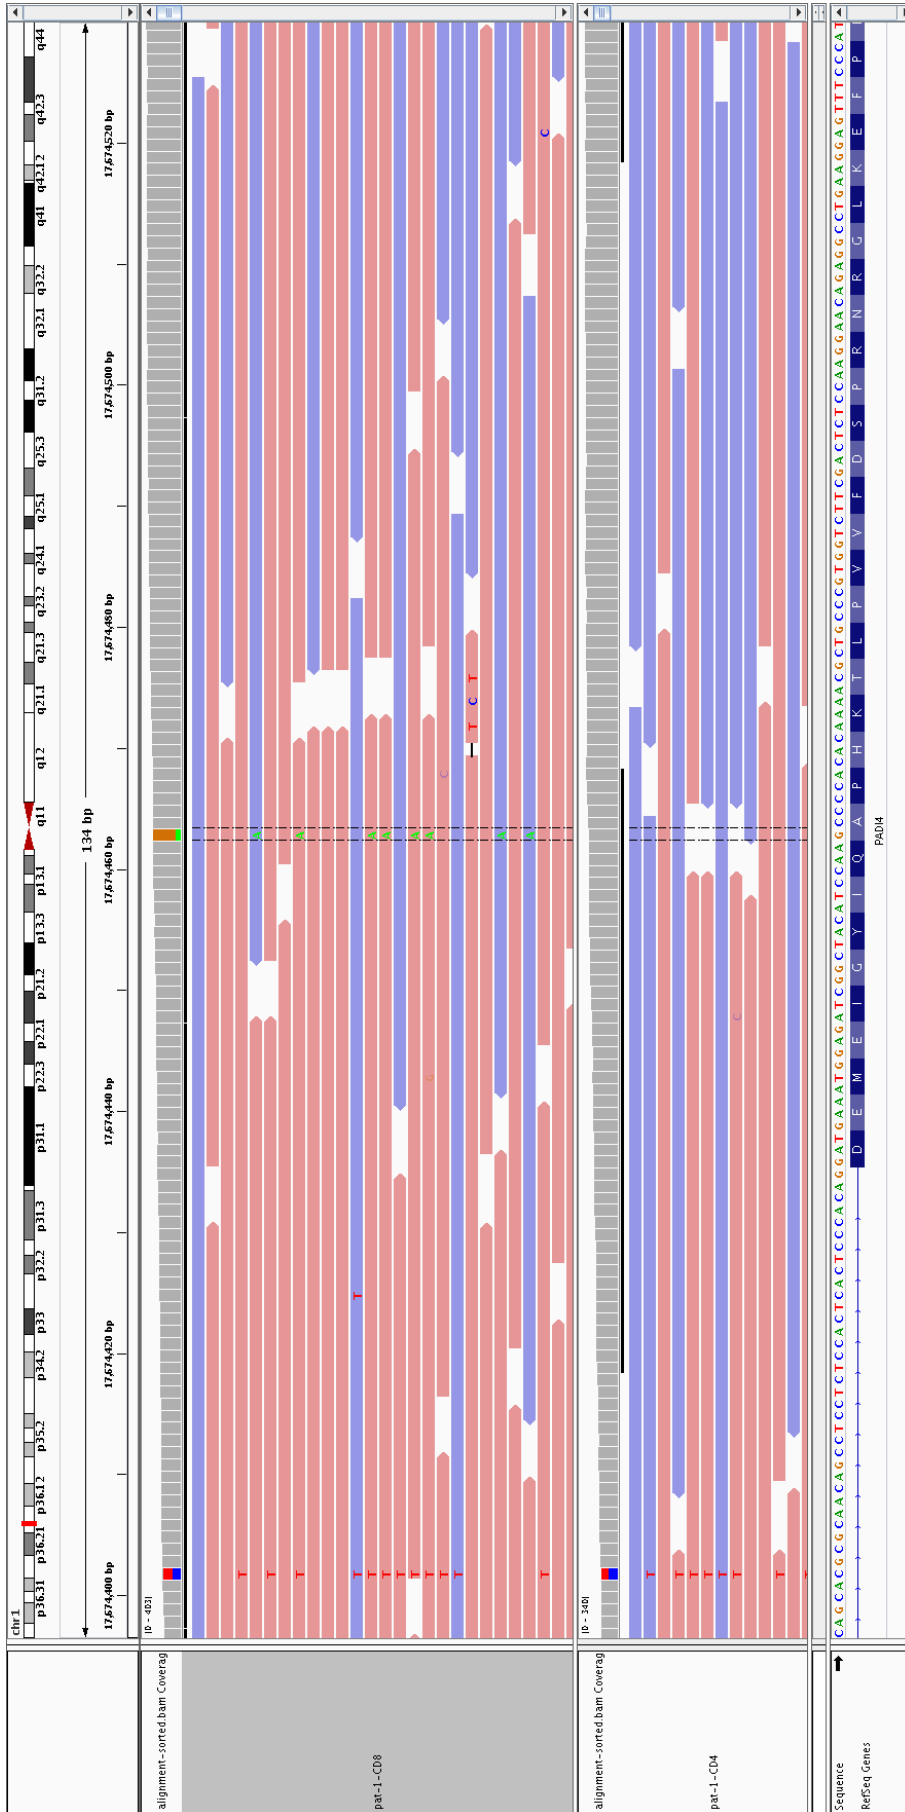



# C: IRF1

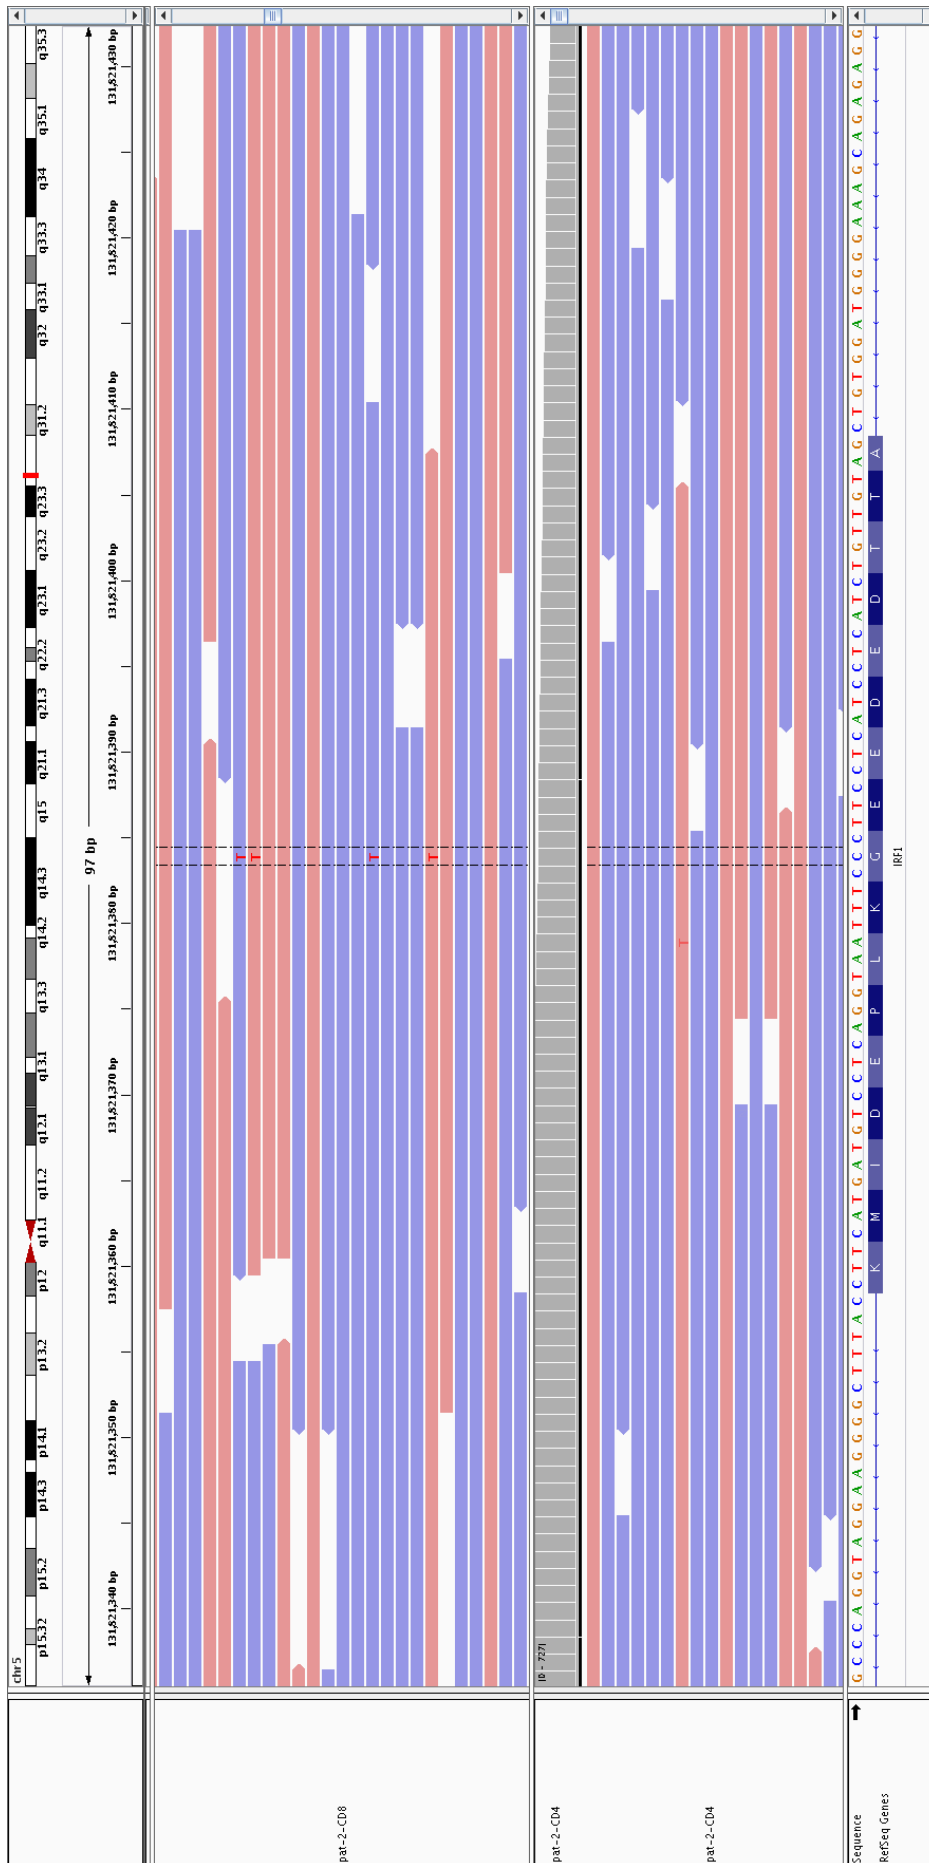

# D: PTPRO

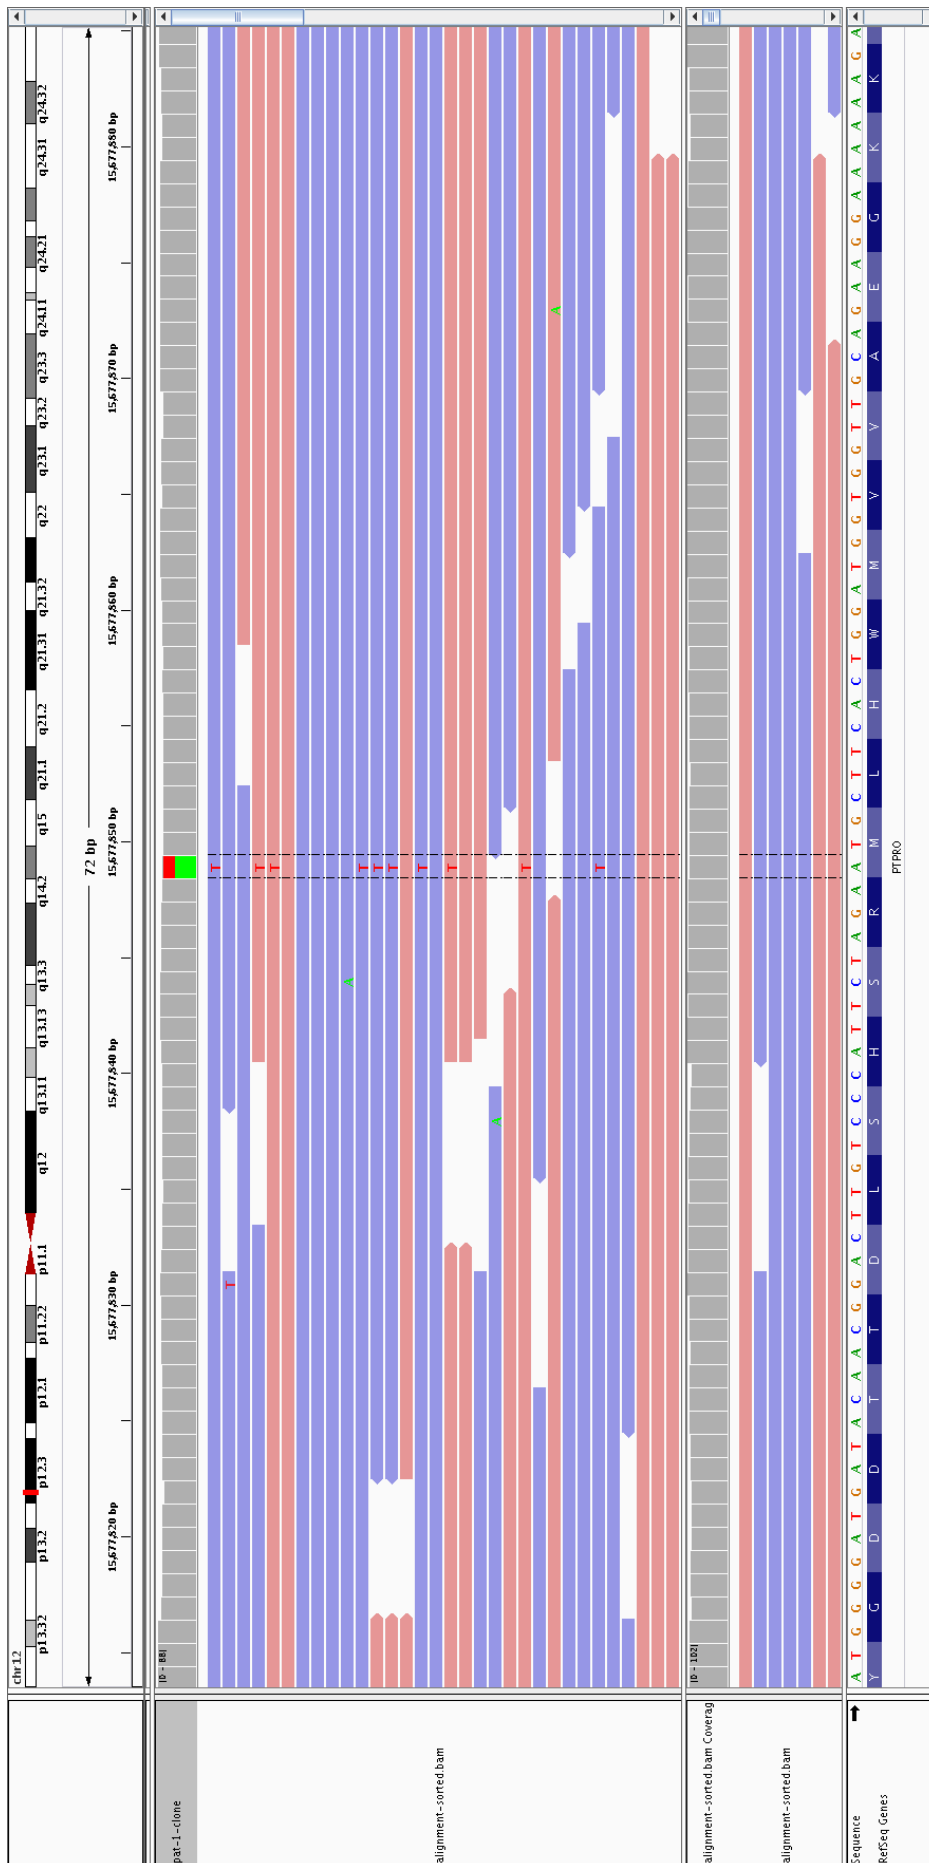



# F: PLRG1

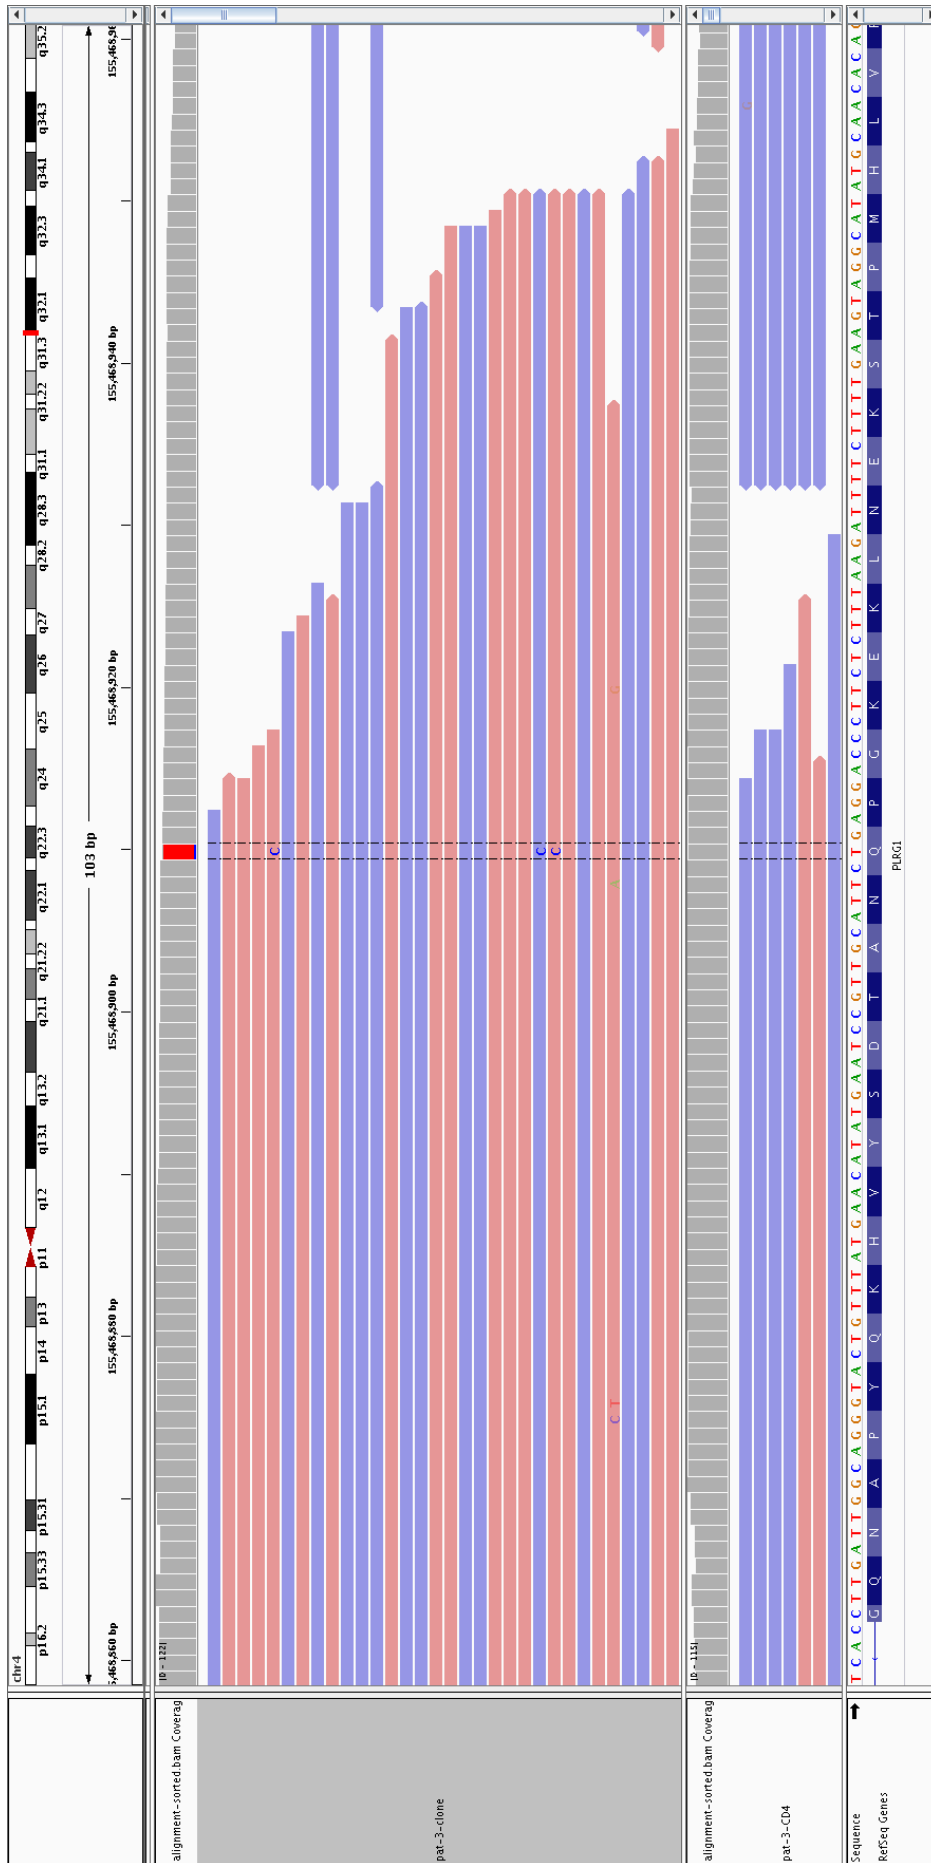

**Supplementary Figure 8. IGV visualization of example mutations.** A-C: Point mutations in *PADI4* (Patient 1), *SLAMF6* (Patient 2) and *IRF1* (Patient 2) were identified using the immunopanel approach, In the left hand panel we display reads from the patient's CD8+ cells, while the right-side panel shows the reads from same patient's CD4+ cells. D-F: Exome sequencing identified somatic mutations in *PTPRO* (Patient 1), *CDK12* (Patient 1) and *PLRG1* (Patient 3). Here the left side displays the reads from the flow-cytometry sorted V $\beta$ -stained CD8+ cells containing the mutated cells, and the CD4+ cells that served as germ-line control are shown on the right side. In the IGV screenshots only a representative sample of all aligned sequencing reads are presented (not all reads). More information on the mutations are presented in **Table 2** and **Supplementary table 6**.



A Patient 1

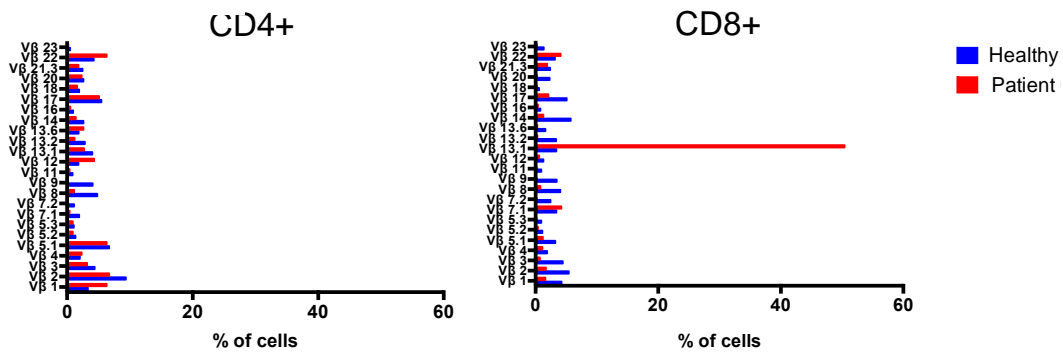

B Patient 2

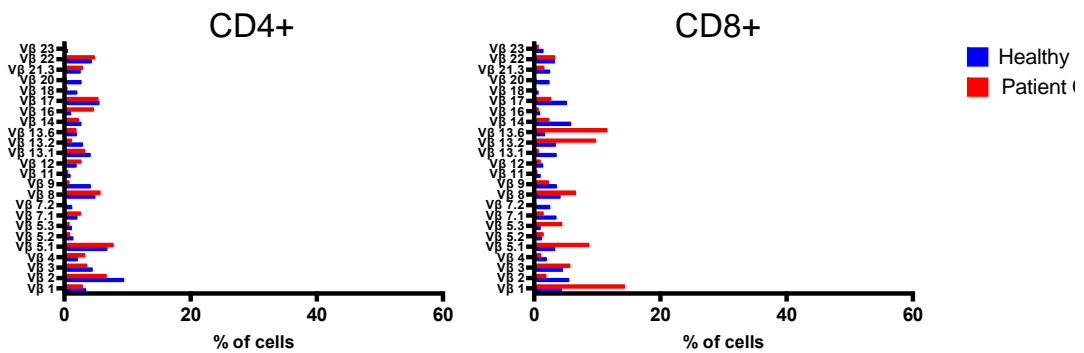

C Patient 3

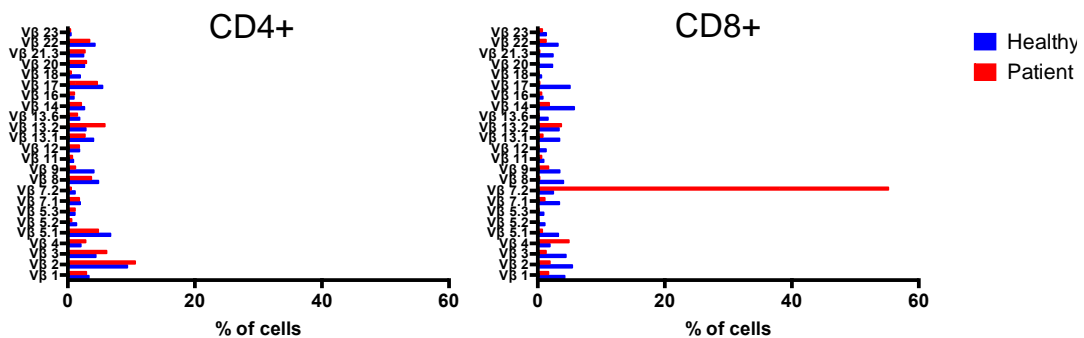

**Supplementary Figure 9. Flow-cytometry analysis of expanded T-cell populations in patients 1, 2, and 3.** RA patients' blood samples were screened for T-cell clonality with an antibody-based flow-cytometry assay. The antibodies target the V $\beta$  region of the TCR, and thus recognize all T-cells using the same V $\beta$ , even if they had a different TCR CD3R sequence. However, a skewed distribution in V $\beta$  usage suggests that the sample has large T-cell clones. The figure shows the flow-cytometry V $\beta$  screening results for patients 1 (A), 2 (B), and 3 (C).

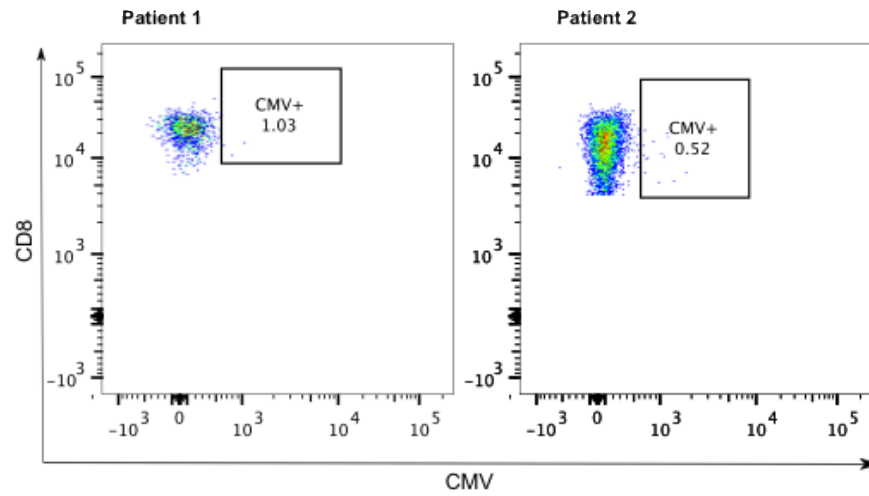

**Supplementary Figure 10. The analysis of CMV-specific T cells with pentamer staining.** To determine if the expanded CD8+ T-cell clones of patients 1 and 2 (who were HLA-A\*0201-positive) were CMV-specific, cells were stained with CMV NLVPMVATV (HLA-A\*0201) pentamer along with anti-CD3, anti-CD4, and anti-CD8 antibodies. Only 0.5-1% of CD8+ T cells were pentamer-positive, indicating that the expanded CD8+ T-cell clones of these two patients are not reactive to this CMV peptide.

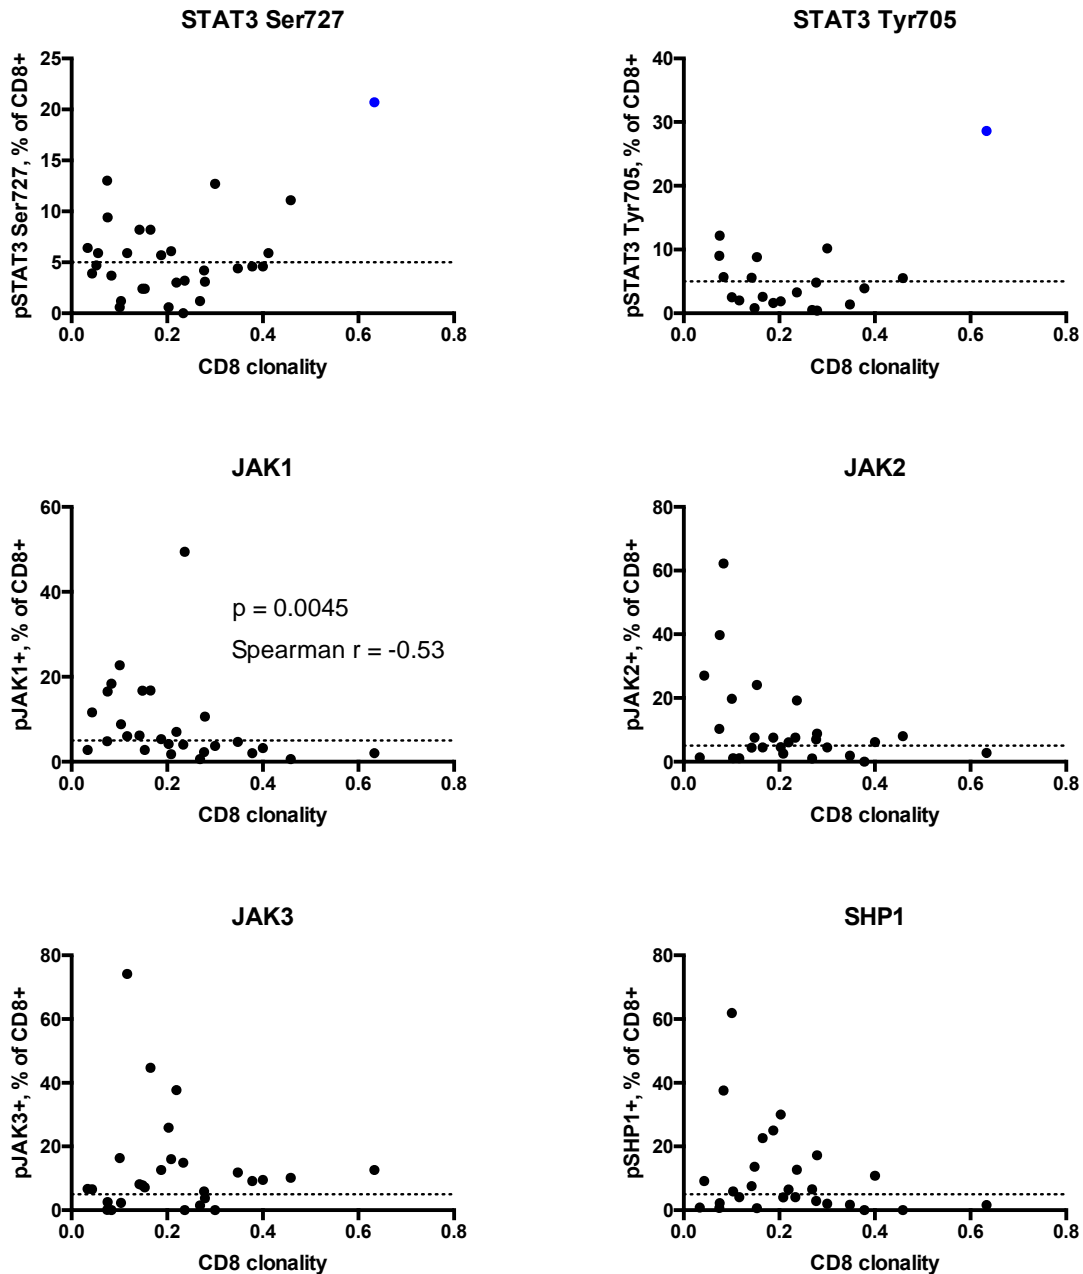

**Supplementary Figure 11. Phosphorylation status of the JAK-STAT3 pathway in CD8+ T cells.** Activation of the JAK-STAT pathway in RA patients was studied with phosphorylation-specific antibodies with flow cytometry. Healthy controls were used to determine the normal level of phosphorylation (<5% of cells phospho-positive, shown in plots with a dotted line). The correlation between clonality and the percent of phosphorylated CD8+ cells was tested with Spearman correlation (Spearman correlation coefficient  $r$  marked on plot if  $p < 0.05$ ). Statistically significant results are marked on the plot. Patient 1 showed remarkable STAT3 Ser727 and Tyr705 phosphorylation in CD8+ T cells, and is marked with blue in these plots.

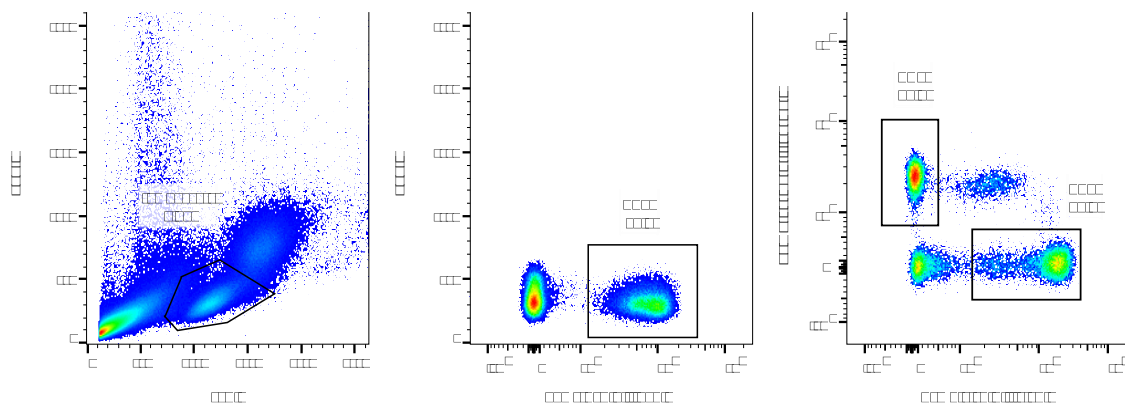

**Supplementary Figure 12. Gating strategy for all PBMC cytometry experiments.** As shown in upper left panel, the lymphocytes were first gated from the total PBMCs based on their morphological characters using SSC-A FSC-A plots. CD3<sup>+</sup> cells were selected based on antibody staining (middle panel) and finally the CD3<sup>+</sup> lymphocytes were separated into CD4<sup>+</sup> and CD8<sup>+</sup> lymphocytes as shown in the right hand panel. This gating strategy was applied in, sorting experiments as well as in the experiments where the lymphocytes' capacity to recognize the immunodominant CMV peptide (NLV).

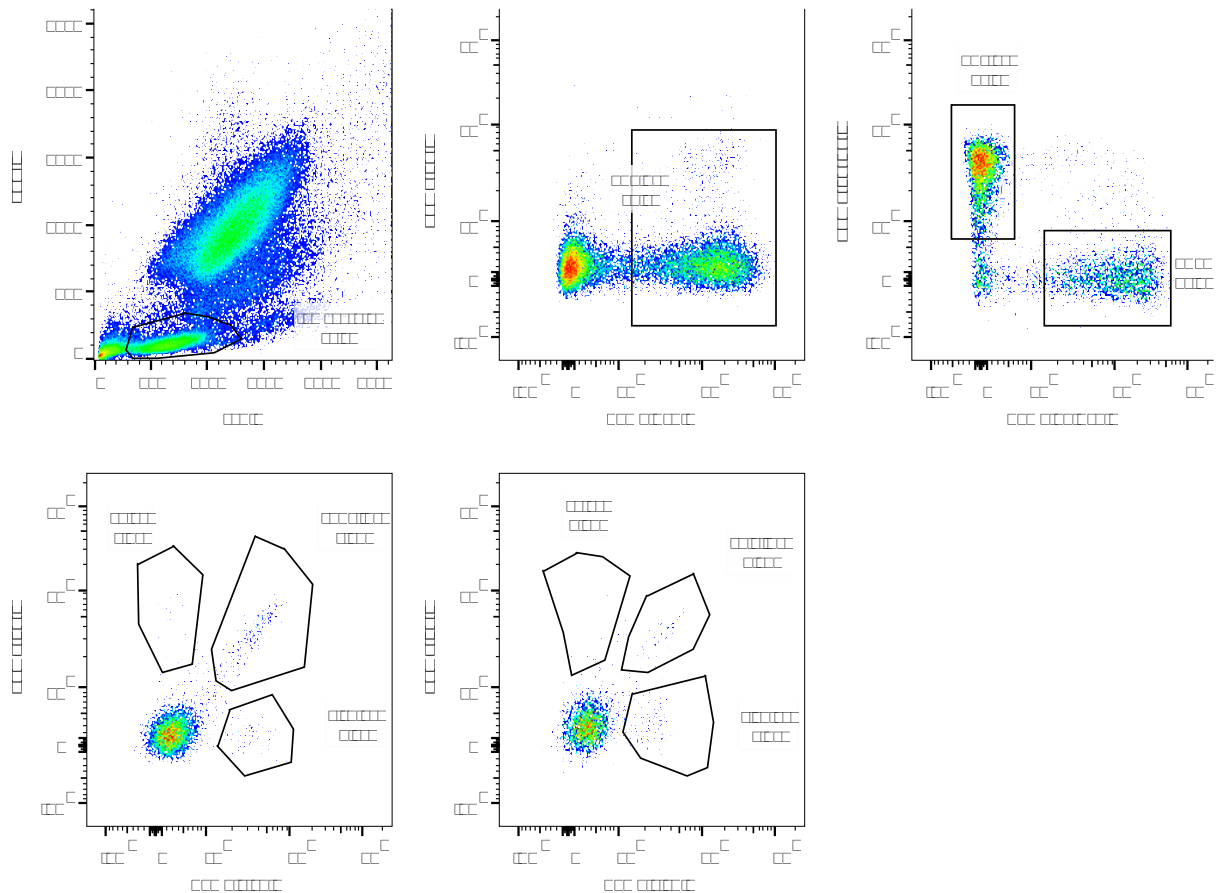

| Vβ     | Fluorochrome | Clone    |
|--------|--------------|----------|
| Vb5.3  | PE           | 3D11     |
| Vb7.1  | PE+FITC      | ZOE      |
| Vb3    | FITC         | CH92     |
| Vb9    | PE           | FIN9     |
| Vb17   | PE+FITC      | E17,5F3  |
| Vb16   | FITC         | TAMAYA   |
| Vb18   | PE           | BA62.6   |
| Vb5.1  | PE+FITC      | IMMU157  |
| Vb20   | FITC         | ELL1.4   |
| Vb13.1 | PE           | IMMU222  |
| Vb13.6 | PE+FITC      | JU74.3   |
| Vb8    | FITC         | 56C5.2   |
| Vb5.2  | PE           | 36213    |
| Vb2    | PE+FITC      | MPB2D5   |
| Vb12   | FITC         | VER2.32  |
| Vb23   | PE           | AF23     |
| Vb1    | PE+FITC      | BL37.2   |
| Vb21.3 | FITC         | IGI25    |
| Vb11   | PE           | C21      |
| Vb22   | PE+FITC      | IMMU546  |
| Vb14   | FITC         | CAS1.1.3 |
| Vb13.2 | PE           | H132     |
| Vb4    | PE+FITC      | WJF24    |
| Vb7.2  | FITC         | ZIZOU4   |

**Supplementary Figure 13. Gating strategy in screening experiments using the panel of T-cell receptor  $\beta$  variable chain (TCR V $\beta$ ) antibodies included in the IOTest Beta Mark TCR V kit. After red blood cell lysis, the lymphocytes from whole blood were first gated based on their morphological characters using**

the SSC-A and FSC-A plots. CD3 positive lymphocytes (upper middle panel) were further divided into CD4+ and CD8+ populations using monoclonal antibodies listed in the materials and methods. Each sample was stained with all 8 antibody cocktails included in the IO test beta mark –staining kit and the  $\beta$  variable chain family was determined based on FITC and PE positivity from the CD8+ (lower left) and from the CD4+ (lower right) populations by comparing the antibody cocktail tube identifier to the list of  $\beta$  variable chain families indicated in the table provided by the manufacturer.

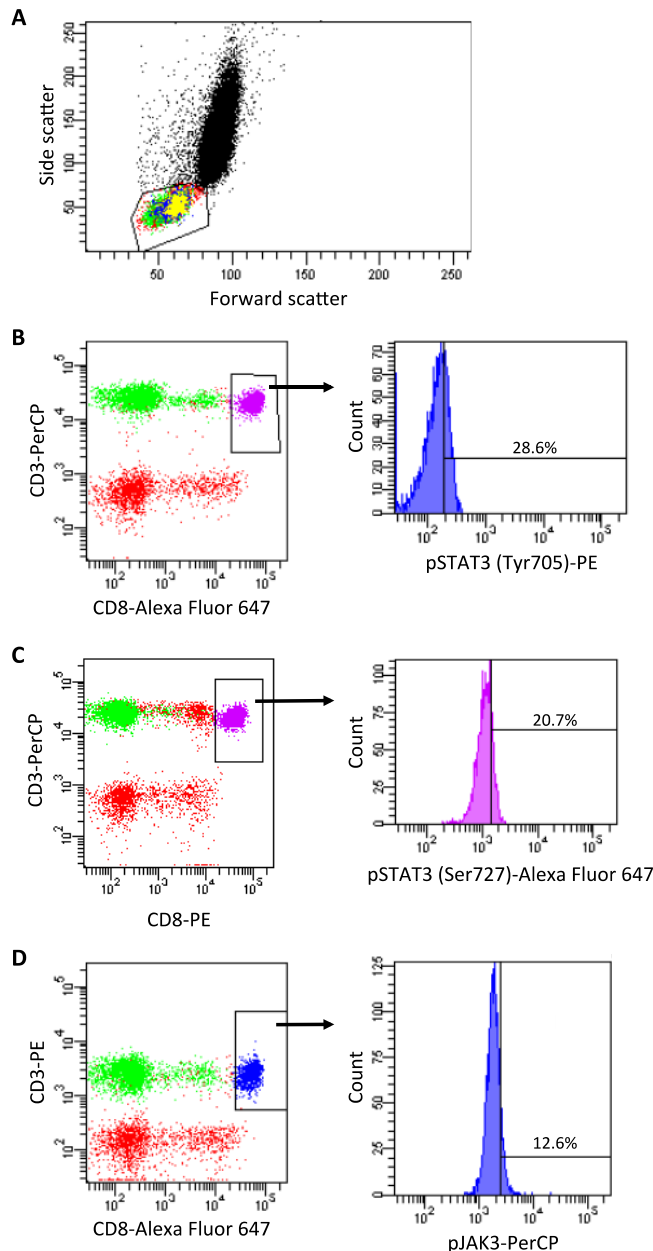

**Supplementary Figure 14. Gating strategy for CD8+ T-cell JAK/STAT phospho-flow analysis.** A) For all analyses, lymphocytes were first gated based on light scattering characteristics. B) For PE-linked phospho-antibodies (pSTAT3 Tyr705 shown, also pJAK1, pJAK2, pSHP-1), CD8-Alexa Fluor 647 and CD3-PerCP double positive lymphocytes were gated. C) For Alexa Fluor 647-linked pSTAT3 (Ser727) antibody, CD8-PE and CD3-PerCP double positive lymphocytes were gated. D) For PerCP-linked pJAK3 antibody, CD8-Alexa Fluor 647 and CD3-PE double positive lymphocytes were gated. After gating for CD3+CD8+ lymphocytes, the appropriate fluorescence intensity histograms were drawn. The gates were set to comprise <5% of the corresponding cells in a healthy control sample, and copied to the patient sample: the corresponding percentage of positive cells in the patient sample is shown (B-D).

|                    | Patient ID | Clone size (% of CD8+) | AA sequence   | nucleotide sequence                                                                             | TCRBV gene              | TCRBJ gene | TCRBD gene |
|--------------------|------------|------------------------|---------------|-------------------------------------------------------------------------------------------------|-------------------------|------------|------------|
| Shared AA sequence | 20         | 2.2                    | CASSPQRNTEAFF | CACCTACACACCCTGCAGCCAGAAGACTCGGCC<br>CTGTATCTCTGCGCCAGCAGCCCCAAAGGAA<br>CACTGAAGCTTTCTTTGGACAA  | 04-03*01                | 01-01*01   | 01         |
|                    | 79         | 2.2                    | CASSPQRNTEAFF | CACCTACACACCCTGCAGCCAGAAGACTCGGCC<br>CTGTATCTCTGCGCCAGCAGCCCTCAGAGGAA<br>CACTGAAGCTTTCTTTGGACAA | 04-03*01                | 01-01*01   | 01         |
| Shared AA sequence | 53         | 2.1                    | CSATRTRNQPQHF | GTGACCAGTGCCCATCCTGAAGACAGCAGCTT<br>CTACATCTGCAGTGCAACGAGGACGGCTCGCA<br>ATCAGCCCCAGCATTTTGGTGAT | 20-01                   | 01-05*01   | 01         |
|                    | 79         | 9.1                    | CSATRTRNQPQHF | GTGACCAGTGCCCATCCTGAAGACAGCAGCTT<br>CTACATCTGCAGTGCTACCAGGACGGCACGCA<br>ATCAGCCCCAGCATTTTGGTGAT | 20-01                   | 01-05*01   | 01         |
| Shared AA sequence | 17         | 8.0                    | CASSYPETQYF   | CTGCTGGGGTTGGAGTCGGCTGCTCCCTCCCA<br>AACATCTGTGTACTTCTGTGCCAGCAGTTATC<br>CGGAGACCCAGTACTTCGGGCCA | 06-02*01 or<br>06-03*01 | 02-05*01   | unknown    |
|                    | 17         | 5.2                    | CASSYPETQYF   | CTGCTGGGGTTGGAGTCGGCTGCTCCCTCCCA<br>AACATCTGTGTACTTCTGTGCCAGCAGTTACC<br>CGGAGACCCAGTACTTCGGGCCA | 06-02*01 or<br>06-03*01 | 02-05*01   | 02-01      |
| Shared AA sequence | 7          | 4.9                    | CASSPSVSYEQYF | AACCTGAGCTCTCTGGAGCTGGGGGACTCAGC<br>TTTGTATTTCTGTGCCAGCAGCCCCAGTGT<br>CCTACGAGCAGTACTTCGGGCCG   | 09-01                   | 01-01*01   | 02-07*01   |
|                    | 7          | 2.3                    | CASSPSVSYEQYF | AACCTGAGCTCTCTGGAGCTGGGGGACTCAGC<br>TTTGTATTTCTGTGCCAGCAGCCATCCGTGA<br>GCTACGAGCAGTACTTCGGGCCG  | 09-01                   | 02-01*02   | 02-07*01   |

**Supplementary Table 1. Shared TCRB sequences in the study patients' CD8+ T-cell clones exceeding 1% of all CD8+.** The amino-acid TCRB sequences of RA patients' CD8+ T-cell clones comprising over 1% of all CD8+ were compared. Two cases of TCRB sharing in these clones was observed (patients 20 and 79, and patients 53 and 79). Interestingly, two patients (17 and 7) harbored two >1% clones with the same amino-acid TCRB sequence in their CD8+ cells.



| Patient ID | Gender | Largest CD8+ clone (% of CD8+) | Age at diagnosis | Hb  | ESR | Leucocytes | Lymphocytes | Neutrophils | Monocytes | Eosinophils | Basophils | Thrombocytes | CRP | RF    | Seropositive | ACPA | DAS28 | tender joints | swollen joints | pat_global | rtg_erosions | HAQ   | Duration |
|------------|--------|--------------------------------|------------------|-----|-----|------------|-------------|-------------|-----------|-------------|-----------|--------------|-----|-------|--------------|------|-------|---------------|----------------|------------|--------------|-------|----------|
| 1          | M      | 33.9                           | 74.7             | 132 | 33  | 6.4        | 1.1         | 4.4         | 0.8       | 0.1         | 0.0       | 233          | 18  | 189   | yes          | 160  | 3.46  | 5             | 0              | 3          | no           | 2     | 5        |
| 2          | F      | 7.8                            | 72.0             | 126 | 47  | 7.1        | 2.1         | 4.1         | 0.6       | 0.3         | 0.1       | 460          | 2   | 19    | yes          | 300  | 3.54  | 1             | 3              | 40         | NA           | 1.3   | NA       |
| 3          | M      | 51.0                           | 44.3             | 156 | 12  | 8.3        | 3.2         | 4.2         | 0.7       | 0.2         | 0.1       | 248          | 3   | NA    | yes          | 200  | NA    | 11            | 1              | 55         | yes          | 0.625 | NA       |
| 4          | F      | 13.2                           | 73.6             | 150 | 31  | 7          | 2.2         | 4.1         | 0.6       | 0.1         | 0.0       | 337          | 6   | 10    | no           | 6    | NA    | 1             | 15             | 18         | NA           | 0.63  | NA       |
| 5          | F      | 29.0                           | 58.8             | 134 | 5   | 9.1        | 3.2         | 4.6         | 1.0       | 0.4         | 0.0       | 311          | 11  | 5     | yes          | 204  | NA    | 4             | 1              | 47         | NA           | NA    | 12       |
| 6          | M      | 11.1                           | 74.5             | 142 | 35  | 10.1       | 1.8         | 7.1         | 0.6       | 0.5         | 0.1       | 268          | 15  | 1.098 | yes          | 300  | 4.03  | 3             | 4              | 50         | no           | 0.8   | 12       |
| 7          | M      | 13.8                           | 66.1             | 141 | 17  | 6.7        | 1.8         | 3.6         | 0.5       | 0.8         | 0.0       | 195          | 7   | 128   | yes          | 300  | 3.87  | 3             | 3              | 25         | no           | 0.5   | 3        |
| 8          | F      | 2.0                            | 60.5             | 121 | 26  | 7.1        | 1.3         | 4.7         | 0.6       | 0.4         | 0.1       | 254          | 12  | 68    | yes          | 60   | 3.09  | 2             | 5              | 23         | yes          | 0.63  | 12       |
| 9          | M      | 17.2                           | 45.3             | 141 | 8   | 8.2        | 2.1         | 5.0         | 0.8       | 0.2         | 0.1       | 234          | 47  | 6     | yes          | 130  | 4.03  | 7             | 3              | 80         | yes          | 1.4   | 5        |
| 10         | M      | 16.2                           | 69.2             | 143 | 15  | 5.4        | 1.8         | 2.6         | 0.7       | 0.2         | 0.0       | 222          | 3   | 45    | yes          | 114  | 3.32  | 1             | 1              | 42         | yes          | 0.88  | 3        |
| 11         | F      | 27.5                           | 52.2             | 140 | 2   | 6.2        | 2.2         | 3.1         | 0.7       | 0.1         | 0.1       | 271          | 3   | 33    | yes          | 50   | 2.13  | 9             | 5              | 9          | no           | 0     | 6        |
| 12         | M      | 15.7                           | 50.6             | 135 | 8   | 5.6        | 1.5         | 3.2         | 0.4       | 0.4         | 0.1       | 226          | 3   | 100   | yes          | 340  | 3.56  | 7             | 4              | 74         | no           | 1.1   | 6        |
| 13         | F      | 9.2                            | 65.7             | 142 | 2   | 8.2        | 2.3         | 4.7         | 0.7       | 0.4         | 0.1       | 299          | 3   | 66    | yes          | 301  | 2.79  | 11            | 4              | 47         | yes          | 0     | 3        |
| 14         | F      | 8.0                            | 73.5             | 137 | 5   | 5.2        | 1.7         | 2.6         | 0.7       | 0.2         | 0.1       | 331          | 3   | 10    | yes          | 46   | 4.54  | 22            | 10             | 47         | no           | 0     | 2        |
| 15         | F      | 4.5                            | 25.0             | 115 | 8   | 4.5        | 1.1         | 2.7         | 0.6       | 0.0         | 0.0       | 204          | 4   | 4     | no           | 6    | 4.8   | 15            | 7              | 84         | no           | 1.75  | 2        |
| 16         | F      | 6.7                            | 62.4             | 143 | 27  | 6.1        | 2.4         | 3.2         | 0.4       | 0.1         | 0.0       | 302          | 4   | 252   | yes          | 341  | 4.21  | 2             | 5              | 34         | yes          | 0.5   | 12       |
| 17         | F      | 20.3                           | 70.7             | 111 | 57  | 5.5        | 1.2         | 3.7         | 0.5       | 0.1         | 0.0       | 406          | 63  | 14    | no           | 18   | 6.02  | 16            | 24             | 20         | NA           | 1.5   | NA       |
| 18         | F      | 10.2                           | 65.1             | 131 | 30  | 8.2        | 2.4         | 5.0         | 0.6       | 0.3         | 0.0       | 239          | 7   | 122   | yes          | 301  | 4.46  | 1             | 2              | 80         | no           | 1     | 12       |
| 19         | F      | 8.0                            | 57.9             | 106 | 47  | 9.6        | 1.0         | 7.8         | 0.6       | 0.2         | 0.1       | 520          | 36  | 284   | yes          | 255  | 5.21  | 6             | 17             | 65         | NA           | 1.5   | 12       |
| 20         | F      | 16.2                           | 46.1             | 133 | 2   | 6.4        | 2.2         | 2.8         | 0.6       | 0.5         | 0.1       | 246          | 3   | 73    | yes          | 301  | 2.1   | 7             | 8              | 18         | no           | 0.13  | 5        |
| 21         | F      | 3.0                            | 48.2             | 124 | 16  | 9          | 1.8         | 6.7         | 0.4       | 0.2         | 0.0       | 279          | 9   | 0     | no           | 0    | 5.03  | 13            | 12             | 7          | no           | 0.375 | 3        |
| 22         | F      | 7.0                            | 68.2             | 130 | 8   | 7.3        | 2.6         | 4.0         | 0.5       | 0.2         | 0.1       | 319          | 2   | 263   | yes          | 301  | 1.89  | 0             | 2              | 3          | no           | 0     | 3        |
| 23         | F      | 5.8                            | 24.4             | 129 | 24  | 6.3        | 1.8         | 3.8         | 0.4       | 0.1         | 0.0       | 246          | 21  | 0     | no           | 6    | 4.24  | 3             | 24             | 24         | NA           | 0.125 | NA       |
| 24         | F      | 5.3                            | 56.9             | 135 | 32  | 6.9        | 3.4         | 3.0         | 0.3       | 0.3         | 0.0       | 229          | 2   | 15    | no           | 0    | 4.71  | 12            | 4              | 55         | NA           | 0     | NA       |
| 25         | M      | 4.2                            | 18.8             | 147 | 12  | 8.1        | 1.3         | 5.9         | 0.8       | 0.1         | 0.0       | 317          | 2   | 52    | yes          | 340  | 3.83  | 9             | 6              | NA         | NA           | NA    | NA       |
| 26         | F      | 1.2                            | 47.5             | 144 | 17  | 7.4        | 1.5         | 5.1         | 0.6       | 0.1         | 0.0       | 340          | 8   | 18    | yes          | 340  | 4.57  | 13            | 12             | 60         | no           | 0     | 8        |
| 27         | M      | NA                             | 64.7             | 137 | 7   | 5.3        | NA          | NA          | NA        | NA          | NA        | 219          | 3   | 5     | no           | 8    | 2.69  | 3             | 2              | 10         | NA           | 0.38  | 6        |
| 28         | F      | 1.5                            | 30.6             | 131 | 35  | 9.8        | 3.0         | 5.9         | 0.6       | 0.2         | 0.0       | 248          | 15  | 25    | yes          | 300  | 4.73  | 4             | 3              | 100        | NA           | 2.25  | 2        |
| 29         | F      | 19.4                           | 32.9             | 130 | 5   | 6.2        | 2.7         | 2.7         | 0.6       | 0.2         | 0.1       | 275          | 4   | 11    | no           | 7    | 3.18  | 15            | 7              | 30         | NA           | 0.5   | 9        |
| 30         | F      | 8.5                            | 65.4             | 129 | 15  | 7.1        | 1.8         | 4.6         | 0.6       | 0.1         | 0.0       | 270          | 3   | 172   | yes          | 38   | 3.31  | 5             | 5              | 9          | NA           | 0     | 2        |
| 31         | F      | 1.2                            | 44.3             | 110 | 52  | 6.6        | 1.9         | 3.9         | 0.4       | 0.3         | 0.1       | 382          | 30  | 16    | yes          | 300  | 3.73  | 0             | 10             | 20         | no           | 1     | 2        |
| 32         | F      | 5.2                            | 39.3             | 123 | 24  | 5.7        | 1.4         | 3.6         | 0.4       | 0.3         | 0.1       | 329          | 6   | 29    | yes          | 300  | 3.49  | 6             | 7              | 22         | NA           | 0.38  | 4        |
| 33         | F      | 6.1                            | 53.4             | 117 | 63  | 6          | 2.0         | 3.2         | 0.5       | 0.2         | 0.0       | 179          | 3   | 65    | yes          | 7    | 5.35  | 12            | 14             | 66         | no           | 1.63  | 3        |
| 34         | F      | NA                             | 56.1             | 140 | 2   | 6.5        | 3.1         | 3.0         | 0.3       | 0.1         | 0.0       | 211          | 3   | 64    | yes          | 9    | 1.61  | 1             | 2              | 80         | NA           | 0     | 12       |
| 35         | F      | NA                             | 66.2             | 138 | 18  | 4.9        | 1.9         | 2.4         | 0.5       | 0.0         | 0.0       | 298          | 3   | 73    | yes          | 7    | 3.21  | 1             | 3              | 10         | no           | 0     | 2        |
| 36         | F      | NA                             | 74.6             | 112 | 34  | 9.2        | 1.7         | 6.7         | 0.5       | 0.4         | 0.1       | 341          | 7   | 58    | yes          | 51   | 3.57  | 0             | 7              | 26         | no           | 0.38  | 6        |
| 37         | F      | 2.6                            | 47.0             | 123 | 86  | 8          | 1.6         | 5.7         | 0.6       | 0.1         | 0.1       | 485          | 9   | 53    | yes          | 150  | 5.06  | 1             | 8              | 50         | no           | 1     | 12       |
| 38         | M      | NA                             | 53.3             | 144 | 26  | 16.1       | 5.5         | 9.0         | 1.1       | 0.3         | 0.0       | 410          | 12  | 143   | yes          | 95   | 5.55  | 10            | 11             | 50         | NA           | 1.88  | 2        |
| 39         | F      | NA                             | 30.0             | 132 | 21  | 6.5        | 1.9         | 4.1         | 0.5       | 0.1         | 0.1       | 280          | 6   | 16    | yes          | 220  | 3.04  | 2             | 2              | 5          | no           | 0     | 12       |
| 40         | F      | 11.2                           | 64.0             | 140 | 5   | 5.7        | 1.9         | 3.2         | 0.3       | 0.2         | 0.1       | 237          | 3   | 188   | yes          | 86   | 1.13  | 0             | 0              | 0          | no           | 0     | 2        |

| Patient ID | Gender | Largest CD8+ clone (% of CD8+) | Age at diagnosis | Hb  | ESR | Leucocytes | Lymphocytes | Neutrophils | Monocytes | Eosinophils | Basophils | Thrombocytes | CRP | RF  | Seropositive | ACPA | DAS28 | tender joints | swollen joints | VAS | erosions | HAQ   | Duration |
|------------|--------|--------------------------------|------------------|-----|-----|------------|-------------|-------------|-----------|-------------|-----------|--------------|-----|-----|--------------|------|-------|---------------|----------------|-----|----------|-------|----------|
| 41         | F      | 1.0                            | 38.4             | 128 | 5   | 4.8        | 1.4         | 2.5         | 0.4       | 0.3         | 0.0       | 235          | 3   | 25  | no           | 26   | 2.11  | 2             | 5              | 30  | NA       | 0.5   | 6        |
| 42         | F      | NA                             | 39.5             | 120 | 5   | 8          | 1.5         | 5.3         | 1.1       | 0.1         | 0.1       | 223          | 3   | 16  | no           | 7    | 4.74  | 24            | 15             | 65  | no       | 1.13  | 4        |
| 43         | M      | NA                             | 71.0             | 133 | 68  | 8.7        | 1.8         | 6.1         | 0.5       | 0.3         | 0.1       | 355          | 82  | 691 | yes          | 300  | 7.12  | 25            | 25             | 50  | yes      | 0.13  | 2        |
| 44         | M      | NA                             | 73.1             | 140 | 19  | 8.9        | 2.1         | 5.7         | 0.8       | 0.2         | 0.0       | 277          | 3   | 20  | no           | 7    | 2.76  | 0             | 1              | 30  | no       | 0.63  | NA       |
| 45         | F      | NA                             | 65.6             | 134 | 15  | 6          | 1.8         | 3.0         | 0.7       | 0.5         | 0.1       | 303          | 4   | 40  | yes          | 150  | 4.88  | 15            | 19             | 30  | no       | 0.68  | 4        |
| 46         | F      | 3.2                            | 45.2             | 132 | 21  | 9.7        | 2.7         | 5.9         | 0.9       | 0.1         | 0.1       | 391          | 12  | 36  | yes          | 340  | 4.79  | 17            | 1              | NA  | NA       | NA    | 2        |
| 47         | F      | 5.5                            | 67.6             | 140 | 2   | 7.1        | 2.6         | 3.7         | 0.6       | 0.3         | 0.1       | 257          | 3   | 17  | yes          | 180  | 1.65  | 1             | 7              | 15  | NA       | 0     | 4        |
| 48         | F      | 3.2                            | 46.1             | 138 | 29  | 7.1        | 1.2         | 5.1         | 0.6       | 0.1         | 0.1       | 314          | 11  | 45  | yes          | 300  | 4.01  | 1             | 10             | 33  | no       | 1     | 2        |
| 49         | M      | 1.8                            | 29.9             | 144 | 5   | 6.4        | 2.2         | 2.7         | 0.5       | 0.9         | 0.1       | 292          | 3   | 354 | yes          | 300  | 2.53  | 4             | 4              | 20  | no       | 0     | 12       |
| 50         | F      | 5.1                            | 32.0             | 131 | 8   | 4.8        | 1.9         | 2.4         | 0.3       | 0.1         | 0.0       | 282          | 3   | 64  | yes          | 180  | 3.72  | 11            | 2              | 82  | no       | 0.25  | 3        |
| 51         | F      | 8.1                            | 49.9             | 140 | 5   | 7.5        | 1.7         | 5.2         | 0.5       | 0.2         | 0.0       | 231          | 4   | 18  | yes          | 301  | 3.63  | 9             | 5              | 33  | no       | 0.63  | 5        |
| 52         | F      | 1.9                            | 33.3             | 126 | 8   | 5.9        | 1.8         | 3.2         | 0.6       | 0.2         | 0.1       | 222          | 6   | 159 | yes          | 340  | 1.67  | 3             | 2              | 15  | NA       | 0     | 9        |
| 53         | F      | 10.7                           | 32.6             | 129 | 12  | 4.1        | 1.1         | 2.3         | 0.6       | 0.1         | 0.0       | 252          | 3   | 11  | yes          | 300  | 4.46  | 12            | 9              | 65  | no       | 0.86  | 4        |
| 54         | F      | 5.1                            | 35.3             | 129 | 58  | 7.6        | 1.3         | 5.4         | 0.5       | 0.4         | 0.1       | 414          | 43  | 0   | no           | 0    | NA    | 18            | 16             | NA  | NA       | NA    | NA       |
| 55         | F      | 1.8                            | 31.1             | 123 | 5   | 8          | 2.3         | 4.9         | 0.6       | 0.2         | 0.0       | 236          | 3   | 35  | yes          | 341  | 5.05  | 27            | 13             | 75  | no       | 2.25  | NA       |
| 56         | F      | 0.8                            | 69.6             | 118 | 32  | 4.7        | 1.7         | 2.3         | 0.6       | 0.1         | 0.0       | 237          | 8   | 32  | yes          | 6    | 5.57  | 13            | 10             | 70  | NA       | 1     | 2        |
| 57         | F      | 2.7                            | 70.4             | 130 | 21  | 10.3       | 2.3         | 7.3         | 0.5       | 0.2         | 0.0       | 218          | 4   | 9   | no           | 6    | 4.34  | 11            | 8              | 48  | no       | 0.8   | NA       |
| 58         | F      | 5.3                            | 49.3             | 127 | 5   | 6.5        | 1.9         | 3.3         | 0.5       | 0.7         | 0.1       | 306          | 3   | 121 | yes          | 340  | 3.76  | 8             | 7              | 22  | no       | 0.5   | 6        |
| 59         | F      | 2.1                            | 54.5             | 126 | 27  | 11.6       | 2.1         | 7.9         | 1.0       | 0.5         | 0.0       | 467          | 10  | 199 | yes          | 340  | 5.08  | 6             | 23             | 49  | no       | 0.5   | 6        |
| 60         | F      | 6.8                            | 62.6             | 134 | 48  | 10.1       | 2.0         | 6.4         | 1.1       | 0.5         | 0.0       | 328          | 45  | 251 | yes          | 301  | 4.94  | 6             | 7              | 37  | NA       | 0.5   | 1        |
| 61         | F      | NA                             | 33.5             | 112 | 24  | 7.5        | 2.0         | 4.1         | 0.8       | 0.6         | 0.0       | 279          | 2   | 59  | yes          | 341  | 4.53  | 12            | 10             | 45  | no       | 0.5   | 4        |
| 62         | F      | 13.6                           | 36.6             | 131 | 12  | 7.5        | 2.8         | 3.3         | 0.6       | 0.8         | 0.1       | 287          | 2   | 26  | yes          | 150  | 3.08  | 6             | 7              | 21  | no       | 0     | 6        |
| 63         | F      | 7.7                            | 63.0             | 128 | 38  | 10         | 2.9         | 4.6         | 1.6       | 0.8         | 0.1       | 500          | 25  | 73  | yes          | 301  | 3.17  | 2             | 7              | 10  | no       | 0.25  | 12       |
| 64         | F      | NA                             | 65.8             | 117 | 54  | 6.8        | 1.3         | 4.8         | 0.3       | 0.4         | 0.0       | 297          | 8   | 212 | yes          | 301  | 4.95  | 3             | 11             | 25  | no       | 1     | 12       |
| 65         | F      | 8.9                            | 37.8             | 118 | 9   | 5.9        | 1.5         | 3.7         | 0.5       | 0.2         | 0.1       | 259          | 2   | 23  | yes          | 49   | 2.54  | 6             | 3              | 15  | NA       | 0.25  | NA       |
| 66         | F      | 25.0                           | 65.5             | 130 | 13  | 5.1        | 1.3         | 3.1         | 0.5       | 0.3         | 0.0       | 245          | 2   | 41  | yes          | 44   | 3.82  | 1             | 8              | 70  | no       | 0.375 | 5        |
| 67         | M      | NA                             | 68.0             | 114 | 59  | 12.1       | 3.1         | 7.4         | 1.1       | 0.4         | 0.1       | 405          | 65  | 8   | no           | 6    | NA    | 20            | 16             | NA  | yes      | NA    | 2        |
| 68         | F      | 4.6                            | 64.3             | 117 | 40  | 8.8        | 1.9         | 5.9         | 0.7       | 0.2         | 0.1       | 374          | 95  | 8   | no           | 6    | 7.09  | 20            | 28             | 70  | no       | 2.1   | 2        |
| 69         | F      | 20.8                           | 81.6             | 124 | 16  | 5.6        | 1.4         | 3.5         | 0.5       | 0.2         | 0.1       | 175          | 2   | 79  | yes          | 301  | 4.46  | 4             | 4              | 60  | no       | 2.5   | 2        |
| 70         | M      | 3.5                            | 47.0             | 150 | 21  | 7.7        | 3.3         | 3.1         | 1.0       | 0.2         | 0.1       | 225          | 13  | 99  | yes          | 301  | 4.99  | 8             | 17             | 40  | no       | 0.25  | 12       |
| 71         | F      | NA                             | 52.2             | 150 | 17  | 12.8       | 4.4         | 6.9         | 0.9       | 0.0         | 0.0       | 233          | 17  | 25  | yes          | 150  | 4.02  | 2             | 2              | 77  | NA       | 0.75  | 3        |
| 72         | F      | 1.7                            | 61.6             | 133 | 76  | 11.6       | 2.6         | 7.5         | 0.9       | 0.5         | 0.1       | 444          | 27  | 289 | yes          | 26   | 6.68  | 15            | 7              | 72  | NA       | 1.88  | NA       |
| 73         | F      | NA                             | 63.0             | 115 | 30  | 9.2        | 1.5         | 6.6         | 0.7       | 0.3         | 0.0       | 188          | 20  | 15  | no           | 19   | 4.71  | 16            | 5              | 42  | yes      | 1     | 7        |
| 74         | F      | 3.5                            | 43.4             | 149 | 5   | 8.1        | 1.5         | 5.9         | 0.6       | 0.0         | 0.0       | 216          | 2   | 256 | yes          | 301  | 2.87  | 8             | 8              | 15  | no       | 0.625 | 7        |
| 75         | M      | 4.7                            | 54.8             | 141 | 20  | 5.9        | 2.5         | 2.2         | 0.7       | 0.4         | 0.1       | 222          | 2   | 489 | yes          | 301  | NA    | 6             | 14             | NA  | no       | NA    | 2        |
| 76         | F      | 0.9                            | 27.5             | 124 | 13  | 7.9        | 2.0         | 4.8         | 0.8       | 0.3         | 0.1       | 269          | 2   | 79  | yes          | 301  | 4.09  |               | 10             | 26  | yes      | 0     | 10       |
| 77         | F      | NA                             | 68.3             | 124 | 7   | 10.9       | 3.5         | 6.3         | 0.5       | 0.3         | 0.1       | 260          | 9   | 35  | yes          | 301  | 2.13  | 0             | 4              | 55  | NA       | 0.5   | 12       |
| 78         | F      | NA                             | 39.1             | 142 | 8   | 9.2        | 2.1         | 6.1         | 0.8       | 0.8         | 0.0       | 232          | 3   | 120 | yes          | 340  | 4.65  | 14            | 5              | 68  | NA       | 1.38  | NA       |
| 79         | F      | 10.3                           | 76.6             | 113 | 68  | 8.1        | 1.7         | 5.5         | 0.7       | 0.1         | 0.0       | 319          | 25  | 11  | no           | 6    | 5.17  | 1             | 5              | 50  | no       | 0.88  | 8        |
| 80         | F      | 2.0                            | 44.2             | 146 | 27  | 7.8        | 2.1         | 5.0         | 0.6       | 0.1         | 0.1       | 349          | 11  | 18  | yes          | 301  | 3.87  | 2             | 2              | 27  | yes      | 1     | 14       |
| 81         | F      | 19.1                           | 59.0             | 122 | 24  | 5.1        | 1.5         | 2.9         | 0.5       | 0.1         | 0.2       | 273          | 5   | 216 | yes          | 120  | 5.28  | 13            | 6              | 92  | NA       | 0.5   | NA       |

| Patient ID | Gender | Largest CD8+ clone (% of CD8+) | Age at diagnosis | Hb  | ESR  | Leucocytes | Lymphocytes | Neutrophils | Monocytes | Eosinophils | Basophils | Thrombocytes | CRP  | RF    | Seropositive | ACPA  | DAS28 | tender joints | swollen joints | pat_global | rig_erosions | HAQ | Duration |
|------------|--------|--------------------------------|------------------|-----|------|------------|-------------|-------------|-----------|-------------|-----------|--------------|------|-------|--------------|-------|-------|---------------|----------------|------------|--------------|-----|----------|
| 82         | F      | 11.2                           | 52.3             | 128 | 19   | 7.1        | 1.7         | 4.7         | 0.4       | 0.1         | 0.2       | 319          | 2    | 79    | yes          | 180   | 5.12  | 19            | 18             | 39         | NA           | 1   | NA       |
| Av         |        | 9.3                            | 53.6             | 131 | 23.4 | 7.5        | 2.1         | 4.5         | 0.6       | 0.3         | 0.0       | 292          | 12.2 | 101   |              | 176.9 | 4.0   | 7.8           | 7.9            | 41.2       |              | 0.7 | 6.0      |
| Med        |        | 6.7                            | 54.7             | 131 | 18.5 | 7.1        | 1.9         | 4.4         | 0.6       | 0.22        | 0.06      | 274          | 4    | 45    |              | 180   | 4.0   | 6             | 7              | 40         |              | 0.6 | 5        |
| Min        |        | 0.78                           | 18.8             | 106 | 2    | 4.1        | 0.96        | 2.2         | 0.3       | 0           | 0         | 175          | 2    | 0     |              | 0     | 1.13  | 0             | 0              | 0          |              | 0   | 1        |
| Max        |        | 51.0                           | 81.6             | 156 | 86   | 16.1       | 5.474       | 9.0         | 1.6       | 0.9         | 0.2       | 520          | 95   | 1,098 |              | 341   | 7.12  | 27            | 28             | 100        |              | 2.5 | 14       |

### Supplementary Table 2. Clinical characteristics of all study patients.

The study comprised of 82 patients (66 female, 16 male). Leukocyte, neutrophil, lymphocyte, monocyte, eosinophil, basophil, and thrombocyte counts are presented as 10E9/l. Abbreviations: CD8+ clone, the size (% of CD8+) the largest CD8+ T-cell clone; dg, diagnosis; Av, average of values in column; Med, median of values in column; Min, smallest value in column; Max, largest value in column; Hb, hemoglobin level (g/l); ESR, erythrocyte sediment rate (mm/h); CRP, C-reactive protein (mg/l), RF, rheumatoid factor (IU/ml); ACPA, anti-citrullinated peptide antibody (U/ml); DAS28, Disease Activity Score in 28 joints; VAS, patient's global assessment of disease activity on visual analogue scale; Erosions, joint erosions detected in hand or feet x-rays at diagnosis; HAQ, Health Assessment Questionnaire; Duration, duration of symptoms (months) before diagnosis; NA, not available. The total numbers of tender and swollen joints (not only counts of joints included in DAS28 score) are shown in separate columns.

| Pat. ID | HLA-A_1 | HLA-A_2 | HLA-B_1 | HLA-B_2 | HLA-C_1 | HLA-C_2 | HLA-DRB1_1 | HLA-DRB1_2 |
|---------|---------|---------|---------|---------|---------|---------|------------|------------|
| 1       | 02:01   | 03:01   | 40:01   | 40:01   | 03:04   | 03:04   | 04:04      | 15:01      |
| 2       | 03:01   | 24:02   | 15:01   | 35:01   | 03:03   | 04:01   | 01:01      | 01:01      |
| 3       | 03:01   | 24:02   | 07:02   | 08:01   | 03:04   | 07:01   | 01:01      | 03:01      |
| 4       | 02:01   | 02:01   | 07:02   | 40:01   | 02:02   | 07:02   | 13:02      | 15:01      |
| 5       | 11:01   | 31:01   | 18:01   | 35:01   | 03:03   | 07:01   | 08:01      | 15:01      |
| 6       | 02:01   | 03:01   | 15:01   | 15:01   | 03:04   | 03:04   | 04:01      | 04:01      |
| 7       | 02:01   | 02:01   | 27:05   | 51:01   | 01:02   | 15:02   | 09:01      | 13:01      |
| 8       | 01:01   | 24:02   | 08:01   | 40:01   | 03:04   | 07:01   | 03:01      | 13:02      |
| 9       | 02:01   | 03:01   | 15:01   | 18:01   | 03:03   | 07:01   | 04:01      | 08:01      |
| 10      | 32:01   | 68:01   | 08:01   | 35:01   | 04:01   | 07:01   | 01:01      | 03:01      |
| 11      | 02:01   | 26:01   | 51:01   | 18:01   | 01:02   | 14:02   | 01:01      | 13:01      |
| 12      | 24:02   | 32:01   | 35:01   | 35:01   | 03:03   | 04:01   | 01:01      | 04:01      |
| 13      | 01:01   | 02:01   | 08:01   | 15:01   | 04:01   | 07:01   | 04:01      | 08:01      |
| 14      | 03:01   | 03:01   | 35:01   | 39:01   | 04:01   | 07:02   | 04:01      | 08:01      |
| 15      | 03:01   | 24:02   | 18:01   | 35:01   | 04:01   | 07:01   | 01:01      | 04:04      |
| 16      | 03:01   | 03:01   | 35:01   | 35:01   | 04:01   | 04:01   | 01:01      | 01:01      |
| 17      | 24:02   | 68:01   | 08:01   | 40:02   | 02:02   | 07:01   | 01:01      | 03:01      |
| 18      | 24:02   | 32:01   | 15:01   | 56:01   | 01:02   | 03:04   | 04:01      | 04:01      |
| 19      | 02:01   | 02:01   | 07:02   | 40:01   | 03:04   | 07:02   | 13:02      | 15:01      |
| 20      | 02:01   | 03:01   | 07:02   | 40:02   | 03:04   | 07:02   | 14:02      | 15:01      |
| 21      | 01:01   | 68:01   | 08:01   | 35:01   | 03:03   | 07:01   | 03:01      | 08:01      |
| 22      | 02:01   | 26:01   | 15:01   | 40:02   | 03:04   | 04:01   | 15:01      | 15:01      |
| 23      | NA      | NA      | NA      | NA      | NA      | NA      | NA         | NA         |
| 24      | 02:01   | 03:01   | 40:01   | 47:01   | 03:04   | 06:02   | 09:01      | 15:01      |
| 25      | 02:01   | 02:01   | 13:02   | 15:01   | 04:01   | 06:02   | 01:01      | 10:01      |
| 26      | 02:01   | 23:01   | 27:05   | 44:03   | 01:02   | 04:01   | 04:08      | 07:01      |
| 28      | 03:01   | 33:03   | 35:01   | 58:01   | 03:02   | 04:01   | 01:01      | 03:01      |
| 29      | 32:01   | 68:01   | 35:01   | 44:02   | 04:01   | 07:04   | 01:01      | 04:01      |
| 30      | 01:01   | 11:01   | 35:01   | 44:02   | 01:02   | 04:01   | 01:01      | 01:01      |
| 31      | 02:01   | 32:01   | 15:01   | 44:02   | 03:04   | 05:01   | 04:01      | 13:03      |
| 32      | 02:01   | 24:02   | 44:02   | 44:02   | 05:01   | 05:01   | 04:01      | 04:01      |
| 33      | 02:01   | 03:01   | 15:01   | 35:03   | 03:04   | 04:01   | 04:01      | 15:01      |
| 37      | 02:01   | 68:01   | 35:01   | 51:01   | 04:01   | 15:02   | 12:01      | 13:01      |
| 40      | 03:01   | 24:02   | 07:02   | 27:05   | 01:02   | 07:02   | 04:01      | 04:08      |
| 41      | 02:01   | 03:01   | 27:05   | 35:01   | 01:02   | 04:01   | 01:01      | 09:01      |
| 46      | 02:01   | 32:01   | 15:01   | 35:01   | 03:03   | 04:01   | 04:01      | 04:01      |
| 47      | 02:01   | 03:01   | 35:01   | 56:01   | 01:02   | 04:01   | 01:01      | 04:01      |
| 48      | 02:01   | 31:01   | 27:05   | 56:01   | 01:02   | 01:02   | 01:01      | 04:08      |
| 49      | 02:01   | 03:01   | 15:01   | 15:01   | 03:04   | 03:04   | 04:01      | 04:01      |
| 50      | 03:01   | 32:01   | 35:01   | 44:02   | 04:01   | 05:01   | 01:01      | 04:01      |
| 51      | 02:01   | 02:01   | 18:01   | 27:05   | 01:02   | 07:01   | 01:01      | 04:01      |
| 52      | 02:01   | 03:01   | 15:01   | 27:05   | 01:02   | 03:03   | 01:01      | 04:01      |
| 53      | 02:01   | 03:01   | 15:01   | 35:01   | 03:03   | 04:01   | 01:01      | 04:01      |
| 54      | 03:01   | 68:01   | 07:02   | 08:01   | 07:01   | 07:02   | 03:01      | 15:01      |
| 55      | 02:01   | 24:02   | 39:01   | 39:01   | 07:02   | 12:03   | 04:04      | 12:01      |
| 56      | 11:01   | 23:01   | 07:02   | 49:01   | 07:01   | 07:02   | 03:01      | 13:01      |
| 57      | 02:01   | 02:01   | 13:02   | 18:01   | 06:02   | 07:01   | 07:01      | 14:01      |
| 58      | 32:01   | 68:01   | 15:01   | 40:01   | 03:03   | 03:04   | 04:04      | 11:01      |
| 59      | 24:02   | 25:01   | 15:01   | 18:01   | 03:03   | 12:03   | 01:01      | 01:01      |
| 60      | 03:01   | 03:01   | 35:01   | 44:27   | 04:01   | 07:04   | 01:01      | 16:01      |
| 61      | 24:02   | 32:01   | 08:01   | 39:01   | 07:01   | 07:02   | 03:01      | 04:04      |
| 62      | 24:02   | 32:01   | 07:02   | 35:01   | 04:01   | 07:02   | 04:01      | 15:01      |
| 63      | 02:01   | 03:01   | 15:01   | 27:05   | 01:02   | 03:03   | 01:01      | 15:01      |
| 65      | 02:01   | 03:01   | 35:01   | 44:02   | 04:01   | 05:01   | 01:01      | 04:01      |
| 66      | 02:01   | 02:01   | 27:05   | 44:02   | 01:02   | 05:01   | 04:08      | 12:01      |
| 68      | 01:01   | 02:01   | 08:01   | 40:01   | 03:04   | 07:01   | 03:01      | 13:02      |
| 69      | 02:01   | 03:01   | 15:01   | 18:01   | 04:01   | 07:01   | 04:04      | 15:01      |
| 70      | 03:01   | 03:01   | 07:02   | 35:01   | 04:01   | 07:02   | 04:04      | 15:01      |
| 72      | 03:01   | 30:01   | 07:02   | 13:02   | 03:04   | 06:02   | 01:01      | 10:01      |
| 74      | 02:03   | 11:01   | 39:09   | 40:02   | 07:02   | 07:02   | 04:05      | 04:05      |
| 75      | 02:01   | 03:01   | 44:02   | 57:01   | 06:02   | 07:04   | 07:01      | 16:01      |
| 76      | 01:01   | 01:01   | 08:01   | 39:01   | 07:01   | 12:03   | 01:01      | 03:01      |
| 79      | 02:01   | 68:01   | 07:02   | 27:05   | 01:02   | 07:04   | 01:01      | 01:01      |
| 80      | 02:01   | 03:01   | 07:02   | 15:01   | 03:04   | 07:02   | 04:01      | 15:01      |
| 81      | 03:01   | 31:01   | 15:01   | 35:01   | 03:03   | 04:01   | 01:01      | 10:01      |
| 82      | 24:02   | 68:01   | 07:02   | 39:01   | 07:02   | 07:02   | 04:04      | 14:01      |
| HC ID   | HLA-A_1 | HLA-A_2 | HLA-B_1 | HLA-B_2 | HLA-C_1 | HLA-C_2 | HLA-DRB1_1 | HLA-DRB1_2 |
| HC1     | 02:01   | 03:01   | 35:03   | 40:01   | 03:04   | 04:01   | 04:03      | 08:01      |
| HC2     | 02:01   | 02:01   | 15:01   | 15:18   | 03:04   | 07:04   | 04:01      | 04:04      |
| HC3     | 01:01   | 24:02   | 08:01   | 39:01   | 07:01   | 07:02   | 08:01      | 12:01      |
| HC4     | 01:01   | 03:01   | 07:02   | 08:01   | 07:01   | 07:02   | 03:01      | 15:01      |
| HC5     | 02:01   | 24:02   | 07:02   | 27:05   | 01:02   | 07:02   | 04:04      | 15:01      |
| HC6     | 01:01   | 02:01   | 44:02   | 57:01   | 05:01   | 06:02   | 07:01      | 15:01      |
| HC7     | 02:01   | 31:01   | 40:01   | 51:01   | 01:02   | 03:04   | 04:04      | 08:01      |
| HC8     | 02:01   | 33:03   | 35:01   | 58:01   | 03:02   | 04:01   | 01:01      | 13:02      |
| HC9     | 24:02   | 24:02   | 40:01   | 51:01   | 03:04   | 14:02   | 09:01      | 11:01      |
| HC10    | 03:01   | 03:01   | 07:02   | 18:01   | 07:01   | 07:02   | 01:01      | 04:04      |
| HC11    | 02:01   | 02:01   | 13:02   | 15:01   | 04:01   | 06:02   | 07:01      | 08:01      |

|      |       |       |       |       |       |       |       |       |
|------|-------|-------|-------|-------|-------|-------|-------|-------|
| HC12 | 02:01 | 03:01 | 27:05 | 35:01 | 02:02 | 04:01 | 01:01 | 08:01 |
| HC13 | 02:01 | 68:01 | 08:01 | 15:01 | 04:01 | 07:01 | 04:04 | 08:01 |
| HC14 | 02:01 | 02:01 | 27:05 | 44:02 | 02:02 | 05:01 | 04:04 | 12:01 |
| HC15 | 02:01 | 02:01 | 15:01 | 27:05 | 02:02 | 03:03 | 08:01 | 13:01 |
| HC16 | 02:01 | 11:01 | 18:01 | 55:01 | 03:03 | 07:01 | 04:04 | 14:54 |
| HC17 | 02:01 | 26:01 | 27:05 | 40:02 | 01:02 | 03:04 | 01:01 | 08:02 |
| HC18 | 02:01 | 02:01 | 13:02 | 15:01 | 03:03 | 06:02 | 07:01 | 13:01 |
| HC19 | 01:01 | 03:01 | 35:01 | 37:01 | 04:01 | 06:02 | 01:01 | 12:01 |
| HC20 | 03:01 | 03:01 | 07:02 | 35:01 | 04:01 | 07:02 | 01:01 | 15:01 |

**Supplementary Table 3. HLA typing of RA patients.** HLA-A, HLA-B, HLA-C, and HLA-DRB1 loci were typed from 65 newly diagnosed RA patients and 20 healthy controls. Patients sequenced with immunogene-panel sequencing are listed first in the table, followed by other RA patients and healthy controls. Abbreviations: HC, healthy control; NA, not available.

|        |         |         |          |          |          |         |         |         |         |         |
|--------|---------|---------|----------|----------|----------|---------|---------|---------|---------|---------|
| A2M    | CCL25   | CD79A   | CXCL5    | GZMA     | IL19     | KIR2DL1 | MPL     | PSIP1   | SOD3    | WIPF1   |
| A2ML1  | CCL26   | CD79B   | CXCL6    | GZMB     | IL1A     | KIR2DL3 | MPO     | PSMB10  | SPN     | VPREB1  |
| ABCB1  | CCL27   | CD80    | CXCL9    | GZMK     | IL1B     | KIR2DL4 | MR1     | PSMB5   | SPP1    | XCL1    |
| ABCF1  | CCL28   | CD81    | CXCR1    | GZMM     | IL1F10   | KIR2DS4 | MRC1    | PSMB6   | SRC     | XCL2    |
| ACE    | CCL3    | CD82    | CXCR2    | HAMP     | IL1R1    | KIR3DL1 | MRC2    | PSMB7   | ST6GAL1 | XCR1    |
| ADA    | CCL3L1  | CD83    | CXCR3    | HCK      | IL1R2    | KIR3DL2 | MRE11A  | PSMB8   | STAT1   | XRCC5   |
| ADAM10 | CCL3L3  | CD84    | CXCR4    | HGF      | IL1RAP   | KIR3DL3 | MS4A1   | PSMB9   | STAT2   | YES     |
| ADAM17 | CCL4    | CD86    | CXCR5    | HLA-A    | IL1RAPL1 | KIT     | MS4A3   | PSME1   | STAT3   | YWHAZ   |
| ADAM8  | CCL4L1  | CD8A    | CXCR6    | HLA-B    | IL1RAPL2 | KITLG   | MS4A5   | PSME2   | STAT4   | ZAP70   |
| AGFG1  | CCL4L2  | CD8B    | CXCR7    | HLA-C    | IL1RL1   | KLRB1   | MSR1    | PSME3   | STAT5A  | ZEB1    |
| AICDA  | CCL5    | CD9     | CYBA     | HLA-DMA  | IL1RL2   | KLRC1   | MST1    | PSMF1   | STAT5B  | ZFP36   |
| AIMP1  | CCL7    | CD93    | CYBB     | HLA-DMB  | IL1RN    | KLRC2   | MST1R   | PSTPIP1 | STAT6   | ZFP36L1 |
| AIRE   | CCL8    | CD96    | CYSLTR1  | HLA-DOA  | IL2      | KLRD1   | MTOR    | PTAFR   | TAGAP   |         |
| ALCAM  | CCND2   | CD97    | CYTL1    | HLA-DOB  | IL20     | KLRK1   | MUC1    | PTEN    | TAL1    |         |
| ALK    | CCND3   | CD99    | DARC     | HLA-DPA1 | IL20RA   | KRAS    | MX1     | PTGER4  | TANK    |         |
| ANP32B | CCNE1   | CD99L2  | DCD      | HLA-DPB1 | IL21     | L1CAM   | MYC     | PTGFRN  | TAP1    |         |
| ANPEP  | CCR1    | CDH5    | DCLRE1C  | HLA-DQA1 | IL21R    | LAG3    | MYD88   | PTGS2   | TAP2    |         |
| ANXA6  | CCR10   | CDK6    | DDR1     | HLA-DQB1 | IL22     | LAIR1   | MYLK    | PTK2    | TAP2    |         |
| ATM    | CCR2    | CDKN1A  | DEFA1    | HLA-DQB2 | IL22RA1  | LAIR2   | NCAM1   | PTK2B   | TAPBP   |         |
| B2M    | CCR3    | CEACAM1 | DEFA3    | HLA-DRA  | IL22RA2  | LAMP1   | NCF1    | PTPN11  | TBK1    |         |
| BACH2  | CCR4    | CEACAM3 | DEFA4    | HLA-DRB5 | IL23A    | LAMP2   | NCF2    | PTPN2   | TBX21   |         |
| BANK1  | CCR5    | CEACAM5 | DEFA5    | HLA-E    | IL23R    | LAMP3   | NCF4    | PTPN22  | TCF3    |         |
| BATF   | CCR6    | CEACAM6 | DEFA6    | HLA-F    | IL24     | LAMTOR3 | NCR1    | PTPN6   | TCF7    |         |
| BAX    | CCR6    | CEACAM8 | DEFB1    | HMGB1    | IL25     | LAX1    | NCR2    | PTPRC   | TCN2    |         |
| BCAM   | CCR7    | CEBPB   | DEFB103A | HMMR     | IL26     | LCK     | NCR3    | PTPRCAP | TDP2    |         |
| BCAP31 | CCR9    | CEBPE   | DEFB105A | HPS3     | IL27     | LCP2    | NDUFS3  | PTPRE   | TEK     |         |
| BCL2   | CCRL1   | CFD     | DEFB106A | HRAS     | IL27RA   | LEAP2   | NFATC1  | PTPRJ   | TFRC    |         |
| BCL2L1 | CCRL2   | CFH     | DEFB119  | HRH2     | IL28A    | LEP     | NFATC2  | PVR     | TGFB1   |         |
| BCL6   | CCRN4L  | CFHR1   | DEFB123  | HRH4     | IL28B    | LIF     | NFATC3  | PVRL1   | THBD    |         |
| BIRC3  | CD101   | CFHR2   | DEFB4A   | HSP90B1  | IL28RA   | LIFR    | NFATC4  | PVRL2   | THY1    |         |
| BLK    | CD109   | CFHR3   | DKC1     | HSPA4    | IL29     | LIG1    | NFIL3   | PXK     | TICAM1  |         |
| BLM    | CD14    | CFHR4   | DOCK2    | HSPA6    | IL2RA    | LIG4    | NFKB1   | RAC1    | TICAM2  |         |
| BMP2   | CD151   | CFHR5   | DPP4     | HSPD1    | IL2RB    | LILRA1  | NFKB2   | RAC2    | TIMP1   |         |
| BSG    | CD160   | CFI     | DUSP1    | HTN3     | IL2RG    | LILRA2  | NFKBIA  | RAG1    | TIRAP   |         |
| BST1   | CD163   | CFLAR   | EBF1     | ICAM1    | IL3      | LILRA3  | NFKBIB  | RAG2    | TLR1    |         |
| BST2   | CD164   | CFP     | EBF2     | ICAM2    | IL31     | LILRA4  | NFKBIE  | RBPJ    | TLR10   |         |
| BTK    | CD164L2 | CHEK1   | EBI3     | ICAM3    | IL31RA   | LILRA4  | NFKBIL1 | REL     | TLR2    |         |
| BTLA   | CD180   | CHL1    | EGF      | ICAM4    | IL32     | LILRA5  | NFRKB   | RELA    | TLR3    |         |
| C1QA   | CD19    | CHUK    | EIF2AK2  | ICOS     | IL33     | LILRA6  | NKX2-3  | RELB    | TLR4    |         |
| C1QB   | CD1A    | CIITA   | ELK1     | IFI16    | IL36A    | LILRB1  | NOD2    | RFX1    | TLR5    |         |
| C1QBP  | CD1B    | CISH    | EMR3     | IFI27    | IL36G    | LILRB2  | NOL3    | RFX5    | TLR6    |         |
| C1QC   | CD1C    | CKLF    | ENC1     | IFI35    | IL36RN   | LILRB3  | NOP9    | RFXANK  | TLR7    |         |
| C1QL1  | CD1D    | CLCF1   | ENG      | IFI44L   | IL37     | LILRB4  | NOS2    | RFXAP   | TLR8    |         |
| C1QL2  | CD1E    | CLEC10A | ENTPD1   | IFIH1    | IL3RA    | LILRB5  | NPTN    | RGS1    | TLR9    |         |
| C1QL3  | CD2     | CLEC12A | EPO      | IFIT1    | IL4      | LITAF   | NRAS    | RHAG    | TLR9    |         |
| C1QL4  | CD200R1 | CLEC16A | EPX      | IFIT1B   | IL4I1    | LPO     | NT5E    | RHCE    | TMED7   |         |

|         |          |         |         |         |          |          |          |          |           |
|---------|----------|---------|---------|---------|----------|----------|----------|----------|-----------|
| C1QTNF2 | CD200R1L | CLEC4A  | ERAP1   | IFIT2   | IL4R     | LRP1     | PADI4    | RHD      | TNF       |
| C1QTNF3 | CD207    | CLEC4C  | ERGIC2  | IFIT3   | IL5      | LTA      | PAFAH1B1 | RIPK1    | TNFAIP3   |
| C1QTNF4 | CD209    | CLEC4D  | ERLIN1  | IFITM1  | IL5RA    | LTB      | PAFAH1B2 | RIPK2    | TNFRSF10A |
| C1QTNF5 | CD22     | CLEC4E  | ETS1    | IFNA2   | IL6      | LTB4R    | PAFAH1B3 | RNASE7   | TNFRSF10B |
| C1QTNF6 | CD226    | CLEC4M  | ETS2    | IFNAR2  | IL6R     | LTB4R2   | PAFAH2   | ROR1     | TNFRSF10C |
| C1QTNF7 | CD244    | CLEC5A  | F3      | IFNB1   | IL6ST    | LTBR     | PARP1    | RORA     | TNFRSF10D |
| C1R     | CD247    | CLEC6A  | FADD    | IFNG    | IL7      | LTF      | PDCD1    | RORC     | TNFRSF11A |
| C1RL    | CD248    | CLEC7A  | FAK     | IFNGR1  | IL7R     | LY75     | PDCD1LG2 | RPA1     | TNFRSF12A |
| C1S     | CD27     | CLECL1  | FAS     | IGF1R   | IL8      | LY86     | PDGFB    | S100A8   | TNFRSF13B |
| C2      | CD274    | CLIP1   | FASLG   | IGF2R   | IL9      | LY9      | PDGFRA   | SAMSN1   | TNFRSF13B |
| C3      | CD276    | CLIP2   | FCAMR   | IGJ     | IL9R     | LY96     | PDGFRB   | SARM1    | TNFRSF13C |
| C3AR1   | CD28     | CLU     | FCAR    | IGLL1   | ILF2     | LYG2     | PELI1    | SCARB1   | TNFRSF14  |
| C4A     | CD2AP    | CMKLR1  | FCER1A  | IGSF8   | ILF3     | LYN      | PELI2    | SCARB2   | TNFRSF17  |
| C4B     | CD2BP2   | CMTM1   | FCER1G  | IKBKAP  | INDO     | LYZ      | PF4      | SCGB3A1  | TNFRSF18  |
| C4BPA   | CD300A   | CMTM2   | FCER2   | IKBKB   | INSR     | MAF      | PGLYRP1  | SDC1     | TNFRSF1A  |
| C4BPB   | CD300C   | CMTM3   | FCGR1A  | IKBKE   | IRAK1    | MAL      | PGLYRP2  | SDF2     | TNFRSF1B  |
| C5      | CD300E   | CMTM4   | FCGR2A  | IKBKG   | IRAK1BP1 | MAP2K3   | PGLYRP3  | SDF2L1   | TNFRSF25  |
| C5AR1   | CD300LB  | CMTM5   | FCGR2B  | IKZF1   | IRAK2    | MAP2K4   | PGLYRP4  | SELE     | TNFRSF4   |
| C6      | CD300LF  | CMTM6   | FCGR2C  | IKZF2   | IRAK3    | MAP2K6   | PIAS3    | SELL     | TNFRSF8   |
| C7      | CD300LG  | CMTM7   | FCGR3A  | IKZF3   | IRAK4    | MAP3K1   | PIK3CG   | SELP     | TNFRSF9   |
| C8A     | CD302    | CMTM8   | FCGR3B  | IL-17   | IRF1     | MAP3K14  | PIK3R1   | SELPLG   | TNFSF10   |
| C8B     | CD320    | COLEC12 | FCGRT   | IL10    | IRF2     | MAP4K4   | PILRA    | SEMA4D   | TNFSF11   |
| C8G     | CD33     | CR1     | FCRL5   | IL10RA  | IRF4     | MAPK1    | PIM1     | SEMA7A   | TNFSF12   |
| C9      | CD34     | CR1L    | FCRLA   | IL10RB  | IRF5     | MAPK10   | PLA2G7   | SERPING1 | TNFSF13   |
| C9orf47 | CD36     | CR2     | FGFR1   | IL11    | IRF8     | MAPK11   | PLA2R1   | SH2B3    | TNFSF13B  |
| CAMP    | CD37     | CRADD   | FGFR2   | IL11RA  | IRF9     | MAPK12   | PLAA     | SH2D1A   | TNFSF14   |
| CANX    | CD38     | CRLF1   | FGFR3   | IL12A   | ISG20    | MAPK13   | PLAUR    | SIGIRR   | TNFSF15   |
| CASP1   | CD3D     | CRLF2   | FGFR4   | IL12B   | ITFG1    | MAPK14   | PLK3     | SIGLEC1  | TNFSF4    |
| CASP10  | CD3E     | CRLF3   | FGR     | IL12B   | ITGA1    | MAPK3    | PLXNC1   | SIGLEC15 | TNFSF8    |
| CASP2   | CD3EAP   | CRP     | FLT3    | IL12RB1 | ITGA2    | MAPK6    | PNP      | SIGLEC5  | TNIP1     |
| CASP3   | CD3G     | CSF1    | FOS     | IL12RB2 | ITGA2B   | MAPK7    | POMC     | SIGLEC6  | TOLLIP    |
| CASP4   | CD4      | CSF1R   | FOXK2   | IL13    | ITGA3    | MAPK8    | POU2AF1  | SIRPA    | TONSL     |
| CASP6   | CD40     | CSF2    | FOXN1   | IL13RA1 | ITGA4    | MAPK8IP3 | PPBP     | SIVA1    | TRADD     |
| CASP7   | CD40LG   | CSF2RA  | FOXO1   | IL13RA2 | ITGA5    | MAPK9    | PPIA     | SLA      | TRAF1     |
| CASP8   | CD44     | CSF2RB  | FOXO3   | IL15    | ITGA6    | MAPKAPK2 | PPP3CA   | SLAMF1   | TRAF2     |
| CASP9   | CD46     | CSF3    | FOXP3   | IL15RA  | ITGAD    | MARCO    | PPP3CB   | SLAMF6   | TRAF3     |
| CCBP2   | CD47     | CSF3R   | FRK     | IL16    | ITGAE    | MASP1    | PPP3CC   | SLAMF7   | TRAF3IP1  |
| CCL1    | CD48     | CSN2    | FUT3    | IL17A   | ITGAL    | MASP2    | PPP3R1   | SLC3A2   | TRAF4     |
| CCL11   | CD5      | CTLA4   | FYN     | IL17B   | ITGAM    | MBL2     | PPP3R2   | SLC44A1  | TRAF5     |
| CCL13   | CD52     | CTSG    | G6PD    | IL17C   | ITGAV    | MBP      | PRDM1    | SLC4A1   | TRAF6     |
| CCL14   | CD53     | CTSS    | GADD45A | IL17D   | ITGAX    | MBTPS1   | PRDX6    | SLC7A5   | TRAF7     |
| CCL15   | CD58     | CX3CL1  | GNLY    | IL17F   | ITGB1    | MCAM     | PRF1     | SMARCAL1 | TSPYL2    |
| CCL16   | CD59     | CX3CR1  | GP1BA   | IL17RA  | ITGB2    | MCL1     | PRG2     | SOCS1    | TYK2      |
| CCL17   | CD5L     | CXCL1   | GP1BB   | IL17RB  | ITGB3    | MDM2     | PRKCD    | SOCS2    | ULBP1     |
| CCL18   | CD6      | CXCL10  | GP5     | IL17RC  | ITGB4    | MF12     | PRKCQ    | SOCS3    | UNG       |
| CCL19   | CD63     | CXCL11  | GP9     | IL17RD  | JAK1     | MICA     | PRNP     | SOCS4    | WAS       |
| CCL2    | CD68     | CXCL12  | GPR183  | IL17RE  | JAK2     | MICB     | PROCR    | SOCS5    | WASF1     |
| CCL20   | CD69     | CXCL13  | GUSB    | IL18    | JAK3     | MIF      | PROM1    | SOCS6    | WASF3     |
| CCL21   | CD7      | CXCL14  | GYP A   | IL18BP  | JUN      | MIF      | PRSS16   | SOCS7    | VCAM1     |

|       |      |        |      |         |        |      |      |      |        |
|-------|------|--------|------|---------|--------|------|------|------|--------|
| CCL22 | CD70 | CXCL16 | GYPB | IL18R1  | KDR    | MME  | PSG1 | SOD1 | VCAN   |
| CCL23 | CD72 | CXCL2  | GYPC | IL18RAP | KEL    | MMP9 |      |      | VEGFA  |
| CCL24 | CD74 | CXCL3  | GYPE |         | KIF21B |      |      |      | WFDC12 |

**Supplementary Table 4. Genes included in the immunogene panel sequencing.** Gene names are presented as HUGO Gene Nomenclature Committee (HGNC) symbols.



| Mean target coverage |                     |                     |
|----------------------|---------------------|---------------------|
| Patient ID           | CD4                 | CD8                 |
| 1                    | 385.3               | 413.2               |
| 2                    | 406.8               | 440.9               |
| 3                    | 404.4               | 405.8               |
| 4                    | 202.9               | 197.8               |
| 5                    | 204.1               | 343.5               |
| 6                    | 193.6               | 365.6               |
| 7                    | 134.4               | 100.3               |
| 8                    | 454.7               | 441.7               |
| 9                    | 397.0               | 386.2               |
| 10                   | 434.2               | 208.0               |
| 11                   | 242.2               | 141.4               |
| 12                   | 163.9               | 228.4               |
| 13                   | 436.6               | 460.0               |
| 14                   | 475.5               | 421.3               |
| 15                   | 419.6               | 505.9               |
| 16                   | 404.0               | 355.4               |
| 17                   | 707.5               | 366.0               |
| 18                   | 351.5               | 343.9               |
| 19                   | 309.1               | 396.0               |
| 20                   | 109.5               | 127.9               |
| 21                   | 469.9               | 569.8               |
| 22                   | 632.3               | 458.1               |
| 23                   | 304.9               | 1128.8              |
| 24                   | 406.2               | 400.4               |
| 25                   | 312.1               | 339.7               |
| Median (IQR)         | 397.0 (223.2-435.4) | 386.2 (284.1-441.3) |
| Mean (95% CI)        | 358.5 (298.6-418.4) | 381.8 (300.7-462.9) |
| HC ID                | CD4                 | CD8                 |
| HC1                  | 1443.8              | 2501.1              |
| HC2                  | 1213.6              | 2345.6              |
| HC3                  | 1743.0              | 1165.6              |
| HC4                  | 1465.7              | 5839.6              |
| HC5                  | 1319.8              | 2161.6              |
| HC6                  | 1438.2              | 1383.0              |
| HC7                  | 722.9               | 1139.7              |
| HC8                  | 255.0               | 390.6               |
| HC9                  | 311.7               | 340.3               |
| HC10                 | 381.7               | 400.8               |
| HC11                 | 300.6               | 372.6               |
| HC12                 | 456.7               | 436.8               |
| HC13                 | 462.9               | 436.4               |
| HC14                 | 549.5               | 450.7               |
| HC15                 | 467.1               | 451.7               |
| HC16                 | 315.1               | 273.9               |
| HC17                 | 308.3               | 287.9               |
| HC18                 | 470.0               | 375.7               |
| HC19                 | 377.2               | 347.2               |
| HC20                 | 341.3               | 309.1               |
| Median (IQR)         | 465.0 (321.7-1293)  | 436.6 (253.6-1329)  |
| Mean (95% CI)        | 717.2 (481.9-952.5) | 1070 (443.9-1697)   |

**Supplementary Table 5. Sequencing coverage of immunogene-panel samples.** Mean target coverage for samples sequenced with immunogene-panel sequencing are presented in the table. The median sequencing depth for healthy controls was higher than for RA patients. Abbreviations: IQR, interquartile range; CI, confidence interval.

### Exome sequencing

| Pat. | Cell fraction | chr | pos (hg 19) | r e f | v a r | Gene                   | Description                                                                                                     | Effect | Exon | Transcript (Ensembl 66) | AA change | CD4+ ref reads | CD4+ var reads | CD4+ var freq | Vβ+ ref reads | Vβ+ var reads | Vβ+ var freq | somatic p-value |
|------|---------------|-----|-------------|-------|-------|------------------------|-----------------------------------------------------------------------------------------------------------------|--------|------|-------------------------|-----------|----------------|----------------|---------------|---------------|---------------|--------------|-----------------|
| 1    | CD8+Vβ1 3.1+  | 12  | 15677849    | A     | T     | <i>PTPRO</i>           | protein tyrosine phosphatase, receptor type, O                                                                  | NS     | 11   | ENST00000281171         | M665L     | 92             | 0              | 0             | 46            | 22            | 32           | 6.613E-10       |
| 1    | CD8+Vβ1 3.1+  | 11  | 88386546    | C     | T     | <i>GRM5</i>            | glutamate receptor, metabotropic 5                                                                              | NS     | 4    | ENST00000418177         | V313M     | 76             | 0              | 0             | 48            | 13            | 21           | 0.000012285     |
| 1    | CD8+Vβ1 3.1+  | 4   | 16017836    | T     | A     | <i>PROM1</i>           | prominin 1                                                                                                      | NS     | 9    | ENST00000447510         | N344Y     | 44             | 0              | 0             | 36            | 14            | 28           | 0.000053814     |
| 1    | CD8+Vβ1 3.1+  | 4   | 100572576   | C     | T     | <i>RP11-766F14.2.1</i> | uncharacterized protein                                                                                         | NS     | 1    | ENST00000511828         | R1077H    | 33             | 0              | 0             | 20            | 11            | 35           | 0.00011387      |
| 1    | CD8+Vβ1 3.1+  | 21  | 10908835    | C     | G     | <i>TPTE</i>            | transmembrane phosphatase with tensin homology                                                                  | NS     | 23   | ENST00000361285         | E504Q     | 117            | 0              | 0             | 97            | 11            | 10           | 0.00023594      |
| 1    | CD8+Vβ1 3.1+  | 9   | 123722610   | A     | T     | <i>C5</i>              | complement component 5                                                                                          | NS     | 38   | ENST00000223642         | C1532S    | 105            | 0              | 0             | 93            | 11            | 11           | 0.0003501       |
| 1    | CD8+Vβ1 3.1+  | 22  | 25627599    | C     | T     | <i>CRYBB2</i>          | crystallin, beta B2                                                                                             | NS     | 6    | ENST00000398215         | R160C     | 49             | 0              | 0             | 41            | 9             | 18           | 0.0014474       |
| 1    | CD8+Vβ1 3.1+  | 1   | 205038666   | G     | A     | <i>CNTN2</i>           | contactin 2 (axonal)                                                                                            | NS     | 17   | ENST00000331830         | G725R     | 25             | 0              | 0             | 18            | 7             | 28           | 0.0048126       |
| 1    | CD8+Vβ1 3.1+  | 20  | 16360582    | C     | T     | <i>KIF16B</i>          | kinesin family member 16B                                                                                       | NS     | 19   | ENST00000408042         | E689K     | 82             | 0              | 0             | 68            | 7             | 9            | 0.0048726       |
| 1    | CD8+Vβ1 3.1+  | 5   | 133496777   | A     | A     | <i>SKP1</i>            | S-phase kinase-associated protein 1                                                                             | FS     | 5    | ENST00000517625         | E73fs     | 33             | 0              | 0             | 15            | 5             | 25           | 0.0054027       |
| 1    | CD8+Vβ1 3.1+  | 17  | 37627581    | G     | A     | <i>CDK12</i>           | cyclin-dependent kinase 12                                                                                      | NS     | 2    | ENST00000447079         | G499E     | 58             | 0              | 0             | 40            | 6             | 13           | 0.006173        |
| 1    | CD8+Vβ1 3.1+  | 2   | 216809684   | A     | T     | <i>MREG</i>            | melanoregulin                                                                                                   | NS     | 5    | ENST00000236976         | F183I     | 47             | 0              | 0             | 32            | 6             | 16           | 0.0063122       |
| 3    | CD8+Vβ7 .2+   | 1   | 167805547   | C     | A     | <i>ADCY10</i>          | adenylate cyclase 10 (soluble)                                                                                  | NS     | 23   | ENST00000367851         | M1103I    | 154            | 0              | 0             | 85            | 28            | 25           | 3.9222E-12      |
| 3    | CD8+Vβ7 .2+   | 4   | 155468910   | T     | C     | <i>PLRG1</i>           | pleiotropic regulator 1                                                                                         | NS     | 3    | ENST00000393905         | Q71R      | 109            | 0              | 0             | 90            | 7             | 7            | 0.0045591       |
| 3    | CD8+Vβ7 .2+   | 4   | 95201870    | T     | G     | <i>SMARCA D1</i>       | SWI/SNF-related, matrix-associated actin-dependent regulator of chromatin, subfamily a, containing DEAD/H box 1 | NS     | 20   | ENST00000359052         | L851W     | 50             | 0              | 0             | 54            | 8             | 13           | 0.0071108       |
| 4    | CD8+V1+       | 21  | 33044259    | T     | C     | <i>SCAF4</i>           | SR-related CTD-associated factor 4                                                                              | NS     | 20   | ENST00000286835         | Q966R     | 51             | 0              | 0             | 30            | 14            | 32           | 5.6241E-06      |
| 4    | CD8+Vβ1 +     | 1   | 220160577   | T     | C     | <i>EPRS</i>            | glutamyl-prolyl-tRNA synthetase                                                                                 | NS     | 20   | ENST00000366923         | N982S     | 82             | 0              | 0             | 59            | 14            | 19           | 0.000012775     |
| 4    | CD8+Vβ1 +     | 4   | 15717329    | G     | G     | <i>BST1</i>            | bone marrow stromal cell antigen 1                                                                              | FS     | 7    | ENST00000382346         | F220fs    | 39             | 0              | 0             | 25            | 11            | 31           | 0.00012266      |
| 4    | CD8+Vβ1 +     | 1   | 36204776    | C     | T     | <i>CLSPN</i>           | claspin                                                                                                         | NS     | 20   | ENST00000318121         | G1131S    | 47             | 0              | 0             | 28            | 8             | 22           | 0.00076719      |
| 4    | CD8+Vβ1 +     | 15  | 81614763    | G     | A     | <i>STARD5</i>          | STAR-related lipid transfer (START) domain containing 5                                                         | ST OP  | 3    | ENST00000302824         | Q90*      | 35             | 0              | 0             | 21            | 8             | 28           | 0.00096972      |
| 4    | CD8+Vβ1 +     | 3   | 44285882    | T     | A     | <i>TOPAZ1</i>          | testis and ovary specific PAZ domain containing T                                                               | FS     | 2    | ENST00000309765         | N628fs    | 71             | 1              | 1.39          | 65            | 11            | 14           | 0.0030399       |
| 4    | CD8+Vβ1 +     | 19  | 12975742    | C     | T     | <i>MAST1</i>           | microtubule associated serine/threonine kinase 1                                                                | NS     | 13   | ENST00000251472         | R496C     | 35             | 0              | 0             | 19            | 6             | 24           | 0.0035375       |
| 4    | CD8+Vβ1 +     | 16  | 5115776     | C     | T     | <i>C16orfβ9</i>        | chromosome 16 open reading frame 89                                                                             | NS     | 1    | ENST00000350219         | R83K      | 36             | 0              | 0             | 33            | 8             | 20           | 0.0045408       |
| 4    | CD8+Vβ1 +     | 6   | 4892329     | C     | G     | <i>CDYL</i>            | chromodomain protein, Y-like                                                                                    | NS     | 4    | ENST00000328908         | A190G     | 94             | 0              | 0             | 80            | 7             | 8            | 0.0052041       |

### Immunogene panel sequencing

| Pat. | Cell fraction | chr. | pos (hg 19) | r e f | v a r | Gene           | Description                                | Effect | Exon | Transcript (Ensembl 66) | AA change | CD4+ ref reads | CD4+ var reads | CD4+ var freq | CD8+ ref reads | CD8+ var reads | CD8+ var freq | somatic p-value |
|------|---------------|------|-------------|-------|-------|----------------|--------------------------------------------|--------|------|-------------------------|-----------|----------------|----------------|---------------|----------------|----------------|---------------|-----------------|
| 1    | CD8+          | 4    | 16017836    | T     | A     | <i>PROM1</i>   | prominin 1                                 | NS     | 4    | ENST00000447510         | N344Y     | 713            | 0              | 0             | 572            | 88             | 13            | 4.0181E-30      |
| 1    | CD8+          | 1    | 17674463    | G     | A     | <i>PADI4</i>   | peptidyl arginine deiminase, type IV       | NS     | 10   | ENST00000375448         | A359T     | 236            | 1              | 0.42          | 217            | 46             | 17            | 4.7195E-13      |
| 1    | CD8+          | 9    | 123722610   | A     | T     | <i>C5</i>      | complement component 5                     | NS     | 9    | ENST00000223642         | C1532S    | 612            | 0              | 0             | 540            | 38             | 7             | 6.335E-13       |
| 1    | CD8+          | 7    | 73803421    | *     | G     | <i>CLIP2</i>   | CAP-GLY domain containing linker protein 2 | SSA    |      | ENST00000223398         |           | 176            | 0              | 0             | 191            | 11             | 5             | 0.00089102      |
| 2    | CD8+          | 5    | 821384      | C     | T     | <i>IRF1</i>    | interferon regulatory factor 1             | NS     | 8    | ENST00000245414         | G231E     | 645            | 0              | 0             | 817            | 57             | 7             | 9.3049E-15      |
| 2    | CD8+          | 22   | 30866019    | C     | T     | <i>SEC14L3</i> | SEC14-like 3 (S. Cerevisiae)               | ST OP  | 4    | ENST00000215812         | W74*      | 629            | 0              | 0             | 669            | 46             | 6             | 1.2234E-13      |
| 2    | CD8+          | 1    | 160460409   | A     | C     | <i>SLAMF6</i>  | SLAM family member 6                       | NS     | 4    | ENST00000368057         | F238C     | 579            | 0              | 0             | 584            | 31             | 5             | 8.0288E-10      |

|         |      |    |                  |        |   |                |                                          |    |   |                     |        |     |   |   |     |    |    |                |
|---------|------|----|------------------|--------|---|----------------|------------------------------------------|----|---|---------------------|--------|-----|---|---|-----|----|----|----------------|
| 4       | CD8+ | 4  | 157<br>173<br>29 | G<br>T | G | <i>BST1</i>    | bone marrow stromal cell antigen 1       | FS | 7 | ENST000003<br>82346 | F220fs | 217 | 0 | 0 | 222 | 20 | 8  | 1.870<br>3E-06 |
| 5       | CD8+ | 17 | 697<br>875<br>8  | C      | T | <i>CLEC10A</i> | C-type lectin domain family 10, member A | NS | 8 | ENST000002<br>54868 | A235T  | 189 | 0 | 0 | 263 | 30 | 10 | 1.767<br>E-07  |
| HC<br>5 | CD8+ | 8  | 274<br>722<br>22 | T      | C | <i>CLU</i>     | clusterin                                | NS | 1 | ENST000005<br>60366 | H26R   | 462 | 0 | 0 | 576 | 93 | 14 | 3.691<br>8E-23 |

**Supplementary Table 6. Somatic mutations discovered in patients and controls.** Exome sequencing of 3 patients' CD8+Vb+ clones (size 40-55% of CD8+) revealed 24 somatic mutations in the expanded clone. CD4+ cells were used as a germline control. Immunogene panel sequencing of 23 patients' and 7 healthy controls' CD4+ and CD8+ cells revealed 10 somatic mutations in CD8+. PROM1, C5, BST1 mutations were discovered with both methods. In all cases, the mutations were validated with amplicon sequencing. \*) GGCTGACCCAGC  
Abbreviations: Pat., patient; chr, chromosome; Pos, position; ref, reference allele; var, variant allele; NS, non-synonymous coding mutation; FS, frameshift; STOP, nonsense mutation; SSA, splice site acceptor; AA, amino acid; freq, frequency.

| Gene     | Mutation identified in the patient | Genomic coordinates (hg19) | No. of samples with the same mutation in COSMIC | Amino-acid change in COSMIC | Tissue                 | Genomic coordinates in COSMIC (hg19) | COSMIC ID   |
|----------|------------------------------------|----------------------------|-------------------------------------------------|-----------------------------|------------------------|--------------------------------------|-------------|
| CRYBB2   | R160C                              | 22:g.25627599C>T           | 1                                               | R160C                       | Central nervous system | 22:g.25627599C>T                     | COSM3405558 |
| IRF1     | G231E                              | 5:g.131821384C>T           | 1                                               | G231E                       | NS                     | 5:g.131821384G>A                     | COSM5867257 |
| CLEC10A  | A235T                              | 17:g.6978758C>T            | 1                                               | A235T                       | Endometrium            | 7:g.6978758G>A                       | COSM983742  |
| SMARCAD1 | L851W                              | 4:g.95201870T>G            | 1                                               | L851W                       | breast                 | 4:g.95201870T>G <sup>1</sup>         | COSM213551  |
| PTPRO    | M665L                              | 12:g.15677849A>T           | 1                                               | M665I                       | endometrium            | 12:g.15677851G>A                     | COSM937606  |
| CDYL     | A190G                              | 6:g.4892329C>G             | 1                                               | A190V                       | large intestine        | 6:g.4892329C>T                       | COSM3353854 |
| SLAMF6   | F238C                              | 1:g.160460409A>C           | 1                                               | F238F                       | Stomach                | 1:g.160460408C>T                     | COSM4024184 |

**Supplementary Table 7. Somatic mutations previously reported in the COSMIC database.** All identified somatic mutations were queried against the Catalogue of somatic mutations in cancer (COSMIC; <http://cancer.sanger.ac.uk/cosmic>)<sup>2</sup> database. Four exactly same mutations occurred in the RA patients as well as in COSMIC. COSMIC also reported three mutations that affect the same amino acid than the mutation in found in our study, but the amino-acid change was different. <sup>1</sup>The protein amino-acid change in COSMIC was L849W but for the canonical transcript the change is L851W.

| Patient ID | Clone size (% of CD8+) | AA sequence       | nucleotide sequence                                                                                         | TCRBV gene            | TCRBJ gene | TCRBD gene   | Target antigen | Reference no.     |
|------------|------------------------|-------------------|-------------------------------------------------------------------------------------------------------------|-----------------------|------------|--------------|----------------|-------------------|
| 19         | 3.1                    | CASSANY<br>GYTF   | CTGAAGATCCAGCCCTC<br>AGAACCCAGGGACTCAG<br>CTGTGTACTTCTGTGCC<br>AGCAGTTCAGCTAACTA<br>TGGCTACACCTTCGGTT<br>CG | 12-3*01 or<br>12-4*01 | 01-02*01   | 01-<br>01*01 | PP65           | 14, 16,<br>and 17 |
| 22         | 3.7                    | CASSANY<br>GYTF   | CTGAAGATCCAGCCCTC<br>AGAACCCAGGGACTCAG<br>CTGTGTACTTCTGTGCC<br>AGCAGTTCGGCTAACTA<br>TGGCTACACCTTCGGTT<br>CG | 12-3*01 or<br>12-4*01 | 01-02*01   | 02-01        | PP65           | 14, 16,<br>and 17 |
| 79         | 1.1                    | CASSANY<br>GYTF   | CTGAAGATCCAGCCCTC<br>AGAACCCAGGGACTCAG<br>CTGTGTACTTCTGTGCC<br>AGCAGTTCGGCTAACTA<br>TGGCTACACCTTCGGTT<br>CG | 12-3*01 or<br>12-4*01 | 01-02*01   | 02-01        | PP65           | 14, 16,<br>and 17 |
| HC4        | 1.3                    | CASSLGQ<br>AYEQYF | AAGATCCAGCGCACACA<br>GCAGGAGGACTCCGCCG<br>TGTATCTCTGTGCCAGC<br>AGCTTAGGCCAGGCCTA<br>CGAGCAGTACTTCGGGC<br>CG | 07-08*01              | 02-07*01   | 01-<br>01*01 | EBV            | 17 and 27         |

**Supplementary Table 8. Public and shared TCR sequences detected in CD8+ T-cell clones exceeding 1% of all CD8+.** We focused our studies on major CD8+ T-cell clones. We compared the TCRB sequences from patients and healthy controls to previously published results: virus-specific TCRs<sup>3-18</sup>, and sequences observed previously in RA<sup>19-33</sup>. Three patients harbored a major clone with a public TCRB sequence, which was directed against CMV. One of the healthy controls harbored a clone targeting EBV<sup>18</sup>, but the same TCRB sequence has been reported as well in RA synovia<sup>28</sup>.

| Assay                  | F primer                 | R primer                 |
|------------------------|--------------------------|--------------------------|
| <i>ADCY10</i>          | TTCAGTGGAAAGGGGTGCTG     | CCCTCTGGAATCTTGCCAGT     |
| <i>BST1</i>            | TGACCTGGTGATCAGAGCCA     | GGGTCCCCCAATTTTCATGCA    |
| <i>C16orf89</i>        | CCTGGCCTCCTCTCTCCTTA     | TTACTGACAGCACTGCCACC     |
| <i>C5</i>              | TGGGCTCATGAGAAACCGT      | AGGGGATCACATGGAATGTTGT   |
| <i>CDK12</i>           | AAGGAGTCCAAGGGTTCACC     | TAGTTGGTAGAGGGGGTGGG     |
| <i>CDYL</i>            | GGACCTCTCCCAACAATGCT     | GGTCCAGTTTCTCAGGGCTC     |
| <i>CLEC10A</i>         | CCTGGCTTCCAGTTCCTGAG     | AAGTCACCACTGCCCTTCTG     |
| <i>CLIP2</i>           | ATGCAGTGGGGTATGTCACC     | CTCCTTCCGCAGCAGCTC       |
| <i>CLSPN</i>           | TTCAGGCTGGTCTCTGAACTC    | GATGAGGAACTGCAGAGTCAAA   |
| <i>CLU</i>             | CGAGCTGTGTCATCCCTCTC     | TGGAGCCAGCACAGCTATTC     |
| <i>CNTN2</i>           | GGTTCCTCTTACGGTGCT       | TGAGTCAGAGCTGTGCAGTG     |
| <i>CRYBB2</i>          | AATGGTTGGGAGGCTTCACC     | TCACTCTCTGGGAGGTCTGG     |
| <i>EPRS</i>            | TCTGTTTCTTAGGCCCCGTC     | GTGTGCTTAGACAATGACTTGAGT |
| <i>GRM5</i>            | AACCAAGGGTTTCGGTGGTT     | GGCCAAAATTTCCATGGTGT     |
| <i>IRF1</i>            | CGTGAATGTGGCACTTGTGG     | GAAGTGAAGTGCAGGGTGA      |
| <i>KIF16B</i>          | TTTTCTTTTTGGAGCTGGTC     | AAGGAGACAGAAAATCGTGCAG   |
| <i>MAST1</i>           | GGTGCTATGGTGCATGTCCA     | TGGGGATCTCAGGGATGAGG     |
| <i>MREG</i>            | TGACTGCTGAGTCCTCATGG     | GGGTGGGTTTTGTTGTTGTT     |
| <i>PADI4</i>           | GCAAGGGTGAGAGTGAGTGG     | GGCAGGCTAAAAGGAGGGAG     |
| <i>PLRG1</i>           | CCATGAGGATCAAAACTTCCA    | TTTCTACGTGAATGGGCCAAA    |
| <i>PROM1</i>           | GGCAACCTTTCTCTAGAATTTCA  | TCATGAGGAATTGTTTTGAAGG   |
| <i>PTPRO</i>           | TGGGATTTTCATGCTCTGCTG    | ACAGACACACAATGCTGGCA     |
| <i>RP11-766F14.2.1</i> | CCTGCTCTGGGGTAACACTG     | CAGCCGAGCTCAGACTTCAA     |
| <i>SCAF4</i>           | CAAGTCTCTGTGCCTGTCCC     | GGGGGTCTGAAGACAGAGA      |
| <i>SEC14L3</i>         | AACATCTTAACCTAGGCCTGGAC  | TCCGCAAGGTGAGACCTATC     |
| <i>SKP1</i>            | AGTTCAAAAAGTGTTCCTTGGTCA | TGGCTCAAGTCAACCTCTAGC    |
| <i>SLAMF6</i>          | CTCCCTCCTCCTGTCTTCCA     | CATAGGACTCCCACCCAGAG     |
| <i>SMARCAD1</i>        | GGAACCTACACATTGTGAGGC    | AGCAAGTCAGTGTGCCAGAA     |
| <i>STARD5</i>          | GTTTGGGGCTTCTCTCCCTC     | TGATTGATGCGTTGGGGTCA     |
| <i>TOPAZ1</i>          | AGAGGAACTGAGCAGAAGAGG    | TCAGCCGTCCTGTGTTCAAT     |
| <i>TPTE</i>            | GGAACAATGGTGGTTCAAGG     | GGAACCTCAATTTCTTTGGAATG  |

**Supplementary Table 9. Amplicon sequencing primers.**

## Supplementary References

### Virus-specific TCR sequences<sup>3-18</sup>

### TCR sequences reported in RA patients<sup>19-33</sup>

- 1 Reveille, JD. The genetic contribution to the pathogenesis of rheumatoid arthritis. *Curr Opin Rheumatol*. 1998;**10**(3): 187-200.
- 2 Forbes, SA, Beare, D, Gunasekaran, P *et al*. COSMIC: exploring the world's knowledge of somatic mutations in human cancer. *Nucleic Acids Res*. 2014.
- 3 Argaet, VP, Schmidt, CW, Burrows, SR *et al*. Dominant selection of an invariant T cell antigen receptor in response to persistent infection by Epstein-Barr virus. *J Exp Med*. 1994;**180**(6): 2335-2340.
- 4 Babel, N, Brestrich, G, Gondek, LP *et al*. Clonotype analysis of cytomegalovirus-specific cytotoxic T lymphocytes. *J Am Soc Nephrol*. 2009;**20**(2): 344-352.
- 5 Cameron, TO, Cohen, GB, Islam, SA & Stern, LJ. Examination of the highly diverse CD4(+) T-cell repertoire directed against an influenza peptide: a step towards TCR proteomics. *Immunogenetics*. 2002;**54**(9): 611-620.
- 6 Hamel, Y, Rohrlich, P, Baron, V *et al*. Characterization of antigen-specific repertoire diversity following in vitro restimulation by a recombinant adenovirus expressing human cytomegalovirus pp65. *Eur J Immunol*. 2003;**33**(3): 760-768.
- 7 Hennecke, J, Carfi, A & Wiley, DC. Structure of a covalently stabilized complex of a human alphabeta T-cell receptor, influenza HA peptide and MHC class II molecule, HLA-DR1. *EMBO J*. 2000;**19**(21): 5611-5624.
- 8 Jones, CM, Lake, RA, Lamb, JR & Faith, A. Degeneracy of T cell receptor recognition of an influenza virus hemagglutinin epitope restricted by HLA-DQ and -DR class II molecules. *Eur J Immunol*. 1994;**24**(5): 1137-1142.
- 9 Klinger, M, Pepin, F, Wilkins, J *et al*. Multiplex Identification of Antigen-Specific T Cell Receptors Using a Combination of Immune Assays and Immune Receptor Sequencing. *PLoS One*. 2015;**10**(10): e0141561.
- 10 Lim, A, Trautmann, L, Peyrat, MA *et al*. Frequent contribution of T cell clonotypes with public TCR features to the chronic response against a dominant EBV-derived epitope: application to direct detection of their molecular imprint on the human peripheral T cell repertoire. *J Immunol*. 2000;**165**(4): 2001-2011.
- 11 Prevost-Blondel, A, Chassin, D, Zeliszewski, D *et al*. Preferential usage of the T-cell receptor by influenza virus hemagglutinin-specific human CD4+ T lymphocytes: in vitro life span of clonotypic T cells. *J Virol*. 1995;**69**(12): 8046-8050.
- 12 Price, DA, Brenchley, JM, Ruff, LE *et al*. Avidity for antigen shapes clonal dominance in CD8+ T cell populations specific for persistent DNA viruses. *J Exp Med*. 2005;**202**(10): 1349-1361.
- 13 Retiere, C, Prod'homme, V, Imbert-Marcille, BM, Bonneville, M, Vie, H & Hallet, MM. Generation of cytomegalovirus-specific human T-lymphocyte clones by using autologous B-lymphoblastoid cells with stable expression

- of pp65 or IE1 proteins: a tool to study the fine specificity of the antiviral response. *J Virol.* 2000;**74**(9): 3948-3952.
- 14 Schwanninger, A, Weinberger, B, Weiskopf, D *et al.* Age-related appearance of a CMV-specific high-avidity CD8+ T cell clonotype which does not occur in young adults. *Immun Ageing.* 2008;**5**(14).
- 15 Trautmann, L, Rimbart, M, Echasserieau, K *et al.* Selection of T cell clones expressing high-affinity public TCRs within Human cytomegalovirus-specific CD8 T cell responses. *J Immunol.* 2005;**175**(9): 6123-6132.
- 16 van Leeuwen, EM, Remmerswaal, EB, Heemskerk, MH, ten Berge, IJ & van Lier, RA. Strong selection of virus-specific cytotoxic CD4+ T-cell clones during primary human cytomegalovirus infection. *Blood.* 2006;**108**(9): 3121-3127.
- 17 Weekes, MP, Wills, MR, Mynard, K, Carmichael, AJ & Sissons, JG. The memory cytotoxic T-lymphocyte (CTL) response to human cytomegalovirus infection contains individual peptide-specific CTL clones that have undergone extensive expansion in vivo. *J Virol.* 1999;**73**(3): 2099-2108.
- 18 Zvyagin, IV, Pogorelyy, MV, Ivanova, ME *et al.* Distinctive properties of identical twins' TCR repertoires revealed by high-throughput sequencing. *Proc Natl Acad Sci U S A.* 2014;**111**(16): 5980-5985.
- 19 Alam, A, Lambert, N, Lule, J *et al.* Persistence of dominant T cell clones in synovial tissues during rheumatoid arthritis. *J Immunol.* 1996;**156**(9): 3480-3485.
- 20 Davey, MP, Burgoine, GA & Woody, CN. TCRB clonotypes are present in CD4+ T cell populations prepared directly from rheumatoid synovium. *Hum Immunol.* 1997;**55**(1): 11-21.
- 21 Fazou, C, Yang, H, McMichael, AJ & Callan, MF. Epitope specificity of clonally expanded populations of CD8+ T cells found within the joints of patients with inflammatory arthritis. *Arthritis Rheum.* 2001;**44**(9): 2038-2045.
- 22 Gonzalez-Quintial, R, Baccala, R, Pope, RM & Theofilopoulos, AN. Identification of clonally expanded T cells in rheumatoid arthritis using a sequence enrichment nuclease assay. *J Clin Invest.* 1996;**97**(5): 1335-1343.
- 23 Goronzy, JJ, Bartz-Bazzanella, P, Hu, W, Jendro, MC, Walser-Kuntz, DR & Weyand, CM. Dominant clonotypes in the repertoire of peripheral CD4+ T cells in rheumatoid arthritis. *J Clin Invest.* 1994;**94**(5): 2068-2076.
- 24 Grom, AA, Thompson, SD, Luyrink, L, Passo, M, Choi, E & Glass, DN. Dominant T-cell-receptor beta chain variable region V beta 14+ clones in juvenile rheumatoid arthritis. *Proc Natl Acad Sci U S A.* 1993;**90**(23): 11104-11108.
- 25 Howell, MD, Diveley, JP, Lundeen, KA *et al.* Limited T-cell receptor beta-chain heterogeneity among interleukin 2 receptor-positive synovial T cells suggests a role for superantigen in rheumatoid arthritis. *Proc Natl Acad Sci U S A.* 1991;**88**(23): 10921-10925.
- 26 Ikeda, Y, Masuko, K, Nakai, Y *et al.* High frequencies of identical T cell clonotypes in synovial tissues of rheumatoid arthritis patients suggest the occurrence of common antigen-driven immune responses. *Arthritis Rheum.* 1996;**39**(3): 446-453.



- 27 Khazaei, HA, Lunardi, C & So, AK. CD4 T cells in the rheumatoid joint are oligoclonally activated and change during the course of disease. *Ann Rheum Dis.* 1995;**54**(4): 314-317.
- 28 Klarenbeek, PL, de Hair, MJ, Doorenspleet, ME *et al.* Inflamed target tissue provides a specific niche for highly expanded T-cell clones in early human autoimmune disease. *Ann Rheum Dis.* 2012;**71**(6): 1088-1093.
- 29 Li, Y, Sun, GR, Tumang, JR, Crow, MK & Friedman, SM. CDR3 sequence motifs shared by oligoclonal rheumatoid arthritis synovial T cells. Evidence for an antigen-driven response. *J Clin Invest.* 1994;**94**(6): 2525-2531.
- 30 Lunardi, C, Marguerie, C & So, AK. An altered repertoire of T cell receptor V gene expression by rheumatoid synovial fluid T lymphocytes. *Clin Exp Immunol.* 1992;**90**(3): 440-446.
- 31 Paliard, X, West, SG, Lafferty, JA *et al.* Evidence for the effects of a superantigen in rheumatoid arthritis. *Science.* 1991;**253**(5017): 325-329.
- 32 Struyk, L, Hawes, GE, Dolhain, RJ *et al.* Evidence for selective in vivo expansion of synovial tissue-infiltrating CD4+CD45RO+ T-lymphocytes on the basis of CDR3 diversity. *Ann N Y Acad Sci.* 1995;**756**(204-207).
- 33 Sun, W, Nie, H, Li, N *et al.* Skewed T-cell receptor BV14 and BV16 expression and shared CDR3 sequence and common sequence motifs in synovial T cells of rheumatoid arthritis. *Genes Immun.* 2005;**6**(3): 248-261.
